# Supplementary material for: Individual-level personality influences social foraging and collective behaviour in wild birds
Source: PubMed Central journal article supplement (PMC4100518; doi:10.1098/rspb.2014.1016), 2014-08-22
Supplement: rspb20141016supp2.pdf [file rspb20141016supp2.pdf]

| ID | PERSONALITY | ARRIVAL | SITES | SITE1.N | SITE2.N | SITE3.N | SITE4.N | ID | PERSONALITY | ARRIVAL | SITES      | SITE1.N | SITE2.N | SITE3.N | SITE4.N | ID  | PERSONALITY | ARRIVAL | SITES | SITE1.N | SITE2.N | SITE3.N | SITE4.N |
|----|-------------|---------|-------|---------|---------|---------|---------|----|-------------|---------|------------|---------|---------|---------|---------|-----|-------------|---------|-------|---------|---------|---------|---------|
| 1  | -0.4769452  | 4       | 9     | 0       | 0       | 0       | 0       | 57 | 0.46721311  | 1       | 4          | 0       | 0       | 0       | 4       | 98  | 0.41604249  | 2       | 0     | 6       | 3       | 0       |         |
| 1  | -0.4769452  | 4       | 5     | 0       | 0       | 0       | 3       | 57 | 0.46721311  | 1       | 0          | 0       | 0       | 0       | 0       | 98  | 0.41604249  | 2       | 0     | 4       | 6       | 0       |         |
| 1  | -0.4769452  | 1       | 0     | 0       | 0       | 0       | 6       | 57 | 0.46721311  | 1       | 0          | 0       | 0       | 0       | 0       | 98  | 0.41604249  | 2       | 0     | 6       | 1       | 0       |         |
| 1  | -0.4769452  | 1       | 0     | 0       | 0       | 0       | 6       | 57 | 0.46721311  | 1       | 0          | 0       | 0       | 0       | 9       | 98  | 0.41604249  | 2       | 0     | 5       | 0       | 0       |         |
| 1  | -0.4769452  | 1       | 5     | 0       | 0       | 0       | 0       | 57 | 0.46721311  | 4       | 0          | 0       | 0       | 0       | 3       | 98  | 0.41604249  | 2       | 0     | 5       | 0       | 0       |         |
| 1  | -0.4769452  | 1       | 2     | 2       | 0       | 0       | 0       | 58 | 0.44441689  | 1       | 8          | 0       | 0       | 0       | 0       | 98  | 0.41604249  | 3       | 1     | 6       | 2       | 0       |         |
| 1  | -0.4769452  | 3       | 0     | 10      | 0       | 0       | 0       | 58 | 0.44441689  | 1       | 11         | 0       | 0       | 0       | 0       | 98  | 0.41604249  | 2       | 0     | 6       | 1       | 0       |         |
| 1  | -0.4769452  | 3       | 1     | 8       | 0       | 0       | 0       | 58 | 0.44441689  | 1       | 0          | 0       | 0       | 0       | 0       | 98  | 0.41604249  | 3       | 0     | 6       | 1       | 0       |         |
| 1  | -0.4769452  | 3       | 3     | 3       | 2       | 0       | 0       | 58 | 0.44441689  | 1       | 6          | 0       | 0       | 0       | 0       | 98  | 0.41604249  | 2       | 0     | 6       | 1       | 0       |         |
| 1  | -0.4769452  | 1       | 2     | 3       | 0       | 0       | 0       | 58 | 0.44441689  | 1       | 5          | 0       | 0       | 0       | 0       | 98  | 0.41604249  | 2       | 0     | 1       | 6       | 0       |         |
| 1  | -0.4769452  | 1       | 2     | 0       | 4       | 2       | 2       | 58 | 0.44441689  | 4       | 3          | 0       | 0       | 1       | 1       | 98  | 0.41604249  | 3       | 0     | 0       | 1       | 0       |         |
| 1  | -0.4769452  | 4       | 0     | 0       | 1       | 2       | 2       | 58 | 0.44441689  | 3       | 0          | 0       | 0       | 6       | 6       | 98  | 0.41604249  | 2       | 0     | 7       | 0       | 0       |         |
| 1  | -0.4769452  | 4       | 1     | 2       | 1       | 3       | 3       | 58 | 0.44441689  | 4       | 0          | 0       | 0       | 2       | 2       | 99  | -0.3058689  | 2       | 0     | 3       | 2       | 0       |         |
| 1  | -0.4769452  | 4       | 2     | 2       | 2       | 0       | 0       | 58 | 0.44441689  | 4       | 0          | 0       | 0       | 0       | 0       | 99  | -0.3058689  | 2       | 0     | 3       | 3       | 0       |         |
| 1  | -0.4769452  | 1       | 0     | 0       | 0       | 6       | 6       | 58 | 0.44441689  | 1       | 0          | 0       | 0       | 0       | 0       | 99  | -0.3058689  | 2       | 0     | 9       | 0       | 0       |         |
| 1  | -0.4769452  | 1       | 10    | 0       | 0       | 0       | 0       | 58 | 0.44441689  | 4       | 6          | 0       | 0       | 0       | 0       | 99  | -0.3058689  | 2       | 0     | 6       | 1       | 0       |         |
| 1  | -0.4769452  | 1       | 3     | 0       | 1       | 0       | 0       | 58 | 0.44441689  | 4       | 0          | 0       | 0       | 0       | 5       | 99  | -0.3058689  | 2       | 0     | 4       | 1       | 0       |         |
| 1  | -0.4769452  | 1       | 4     | 0       | 2       | 0       | 0       | 58 | 0.44441689  | 4       | 0          | 0       | 0       | 7       | 7       | 99  | -0.3058689  | 3       | 0     | 3       | 4       | 0       |         |
| 1  | -0.4769452  | 3       | 0     | 0       | 15      | 0       | 0       | 58 | 0.44441689  | 4       | 0          | 0       | 0       | 2       | 2       | 100 | -0.2018082  | 2       | 0     | 3       | 3       | 0       |         |
| 1  | -0.4769452  | 3       | 0     | 0       | 5       | 0       | 0       | 58 | 0.44441689  | 1       | 4          | 1       | 0       | 2       | 2       | 100 | -0.2018082  | 2       | 0     | 4       | 3       | 0       |         |
| 1  | -0.4769452  | 3       | 0     | 0       | 7       | 0       | 0       | 58 | 0.44441689  | 4       | 4          | 0       | 0       | 0       | 8       | 100 | -0.2018082  | 3       | 0     | 5       | 1       | 0       |         |
| 1  | -0.4769452  | 3       | 1     | 0       | 5       | 0       | 0       | 58 | 0.44441689  | 4       | 1          | 0       | 0       | 4       | 4       | 100 | -0.2018082  | 3       | 0     | 5       | 1       | 0       |         |
| 1  | -0.4769452  | 3       | 0     | 0       | 4       | 0       | 0       | 58 | 0.44441689  | 1       | 4          | 0       | 0       | 3       | 3       | 100 | -0.2018082  | 2       | 0     | 2       | 3       | 1       |         |
| 1  | -0.4769452  | 3       | 0     | 0       | 9       | 0       | 0       | 58 | 0.44441689  | 1       | 3          | 0       | 0       | 4       | 4       | 100 | -0.2018082  | 3       | 0     | 0       | 6       | 0       |         |
| 1  | -0.4769452  | 3       | 0     | 0       | 9       | 0       | 0       | 58 | 0.44441689  | 1       | 6          | 3       | 0       | 0       | 0       | 101 | -0.5603354  | 2       | 0     | 7       | 0       | 0       |         |
| 1  | -0.4769452  | 3       | 0     | 0       | 3       | 0       | 0       | 58 | 0.44441689  | 1       | 0          | 0       | 0       | 0       | 0       | 101 | -0.5603354  | 3       | 0     | 0       | 0       | 0       |         |
| 1  | -0.4769452  | 3       | 0     | 0       | 8       | 0       | 0       | 58 | 0.44441689  | 1       | 5          | 0       | 0       | 0       | 0       | 101 | -0.5603354  | 2       | 0     | 0       | 0       | 0       |         |
| 1  | -0.4769452  | 3       | 0     | 0       | 12      | 0       | 0       | 59 | -0.6506817  | 1       | 0          | 0       | 0       | 0       | 0       | 101 | -0.5603354  | 4       | 0     | 0       | 0       | 7       |         |
| 1  | -0.4769452  | 3       | 0     | 2       | 8       | 0       | 0       | 59 | -0.6506817  | 2       | 0          | 0       | 0       | 0       | 0       | 102 | 0.31547231  | 2       | 0     | 7       | 0       | 2       |         |
| 1  | -0.4769452  | 4       | 0     | 0       | 0       | 2       | 2       | 59 | -0.6506817  | 1       | 4          | 3       | 0       | 0       | 0       | 102 | 0.31547231  | 2       | 0     | 9       | 0       | 0       |         |
| 1  | -0.4769452  | 3       | 0     | 7       | 0       | 10      | 2       | 59 | -0.6506817  | 0       | -0.6506817 | 0       | 0       | 12      | 12      | 102 | 0.31547231  | 3       | 0     | 2       | 2       | 0       |         |
| 2  | -1.0982582  | 2       | 0     | 0       | 0       | 0       | 0       | 59 | -0.6506817  | 4       | 7          | 0       | 0       | 0       | 0       | 102 | 0.31547231  | 2       | 0     | 2       | 6       | 1       |         |
| 2  | -1.0982582  | 2       | 0     | 8       | 0       | 0       | 0       | 59 | -0.6506817  | 4       | 0          | 0       | 0       | 7       | 7       | 102 | 0.31547231  | 4       | 0     | 0       | 0       | 5       |         |
| 2  | -1.0982582  | 2       | 0     | 9       | 0       | 0       | 0       | 59 | -0.6506817  | 4       | 0          | 0       | 8       | 8       | 8       | 102 | 0.31547231  | 4       | 0     | 0       | 0       | 7       |         |
| 2  | -1.0982582  | 2       | 6     | 3       | 0       | 0       | 0       | 59 | -0.6506817  | 4       | 0          | 0       | 6       | 6       | 6       | 102 | 0.31547231  | 4       | 0     | 0       | 0       | 13      |         |
| 2  | -1.0982582  | 2       | 0     | 8       | 0       | 0       | 0       | 59 | -0.6506817  | 4       | 5          | 0       | 0       | 2       | 2       | 102 | 0.31547231  | 4       | 0     | 0       | 0       | 6       |         |
| 2  | -1.0982582  | 2       | 0     | 7       | 0       | 0       | 0       | 59 | -0.6506817  | 4       | 0          | 0       | 0       | 3       | 3       | 102 | 0.31547231  | 4       | 0     | 0       | 0       | 7       |         |
| 2  | -1.0982582  | 2       | 1     | 8       | 0       | 0       | 0       | 59 | -0.6506817  | 4       | 0          | 0       | 0       | 0       | 0       | 102 | 0.31547231  | 4       | 0     | 0       | 0       | 7       |         |
| 2  | -1.0982582  | 3       | 2     | 2       | 0       | 0       | 0       | 59 | -0.6506817  | 4       | 3          | 0       | 0       | 1       | 1       | 102 | 0.31547231  | 4       | 0     | 2       | 6       | 0       |         |
| 2  | -1.0982582  | 4       | 0     | 0       | 10      | 0       | 0       | 59 | -0.6506817  | 4       | 7          | 0       | 0       | 0       | 0       | 103 | -0.6086034  | 3       | 0     | 6       | 4       | 0       |         |
| 2  | -1.0982582  | 2       | 0     | 7       | 0       | 0       | 0       | 59 | -0.6506817  | 4       | 0          | 0       | 0       | 0       | 0       | 103 | -0.6086034  | 3       | 0     | 0       | 7       | 0       |         |
| 2  | -1.0982582  | 2       | 0     | 0       | 0       | 0       | 0       | 59 | -0.6506817  | 4       | 5          | 5       | 0       | 0       | 0       | 103 | -0.6086034  | 2       | 0     | 0       | 6       | 6       |         |
| 2  | -1.0982582  | 3       | 0     | 0       | 5       | 3       | 0       | 59 | -0.6506817  | 5       | 0          | 0       | 0       | 6       | 6       | 103 | -0.6086034  | 4       | 0     | 0       | 0       | 5       |         |
| 2  | -1.0982582  | 3       | 0     | 0       | 4       | 0       | 0       | 59 | -0.6506817  | 4       | 2          | 0       | 0       | 2       | 2       | 103 | -0.6086034  | 4       | 0     | 0       | 1       | 4       |         |
| 2  | -1.0982582  | 3       | 0     | 0       | 2       | 0       | 0       | 59 | -0.6506817  | 4       | 3          | 0       | 0       | 1       | 1       | 104 | -0.7008536  | 2       | 0     | 3       | 4       | 1       |         |
| 2  | -1.0982582  | 3       | 0     | 0       | 6       | 0       | 0       | 59 | -0.6506817  | 4       | 0          | 0       | 0       | 0       | 0       | 104 | -0.7008536  | 4       | 0     | 0       | 0       | 9       |         |
| 2  | -1.0982582  | 3       | 0     | 0       | 6       | 2       | 2       | 59 | -0.6506817  | 4       | 0          | 0       | 0       | 3       | 3       | 104 | -0.7008536  | 4       | 0     | 0       | 0       | 9       |         |
| 2  | -1.0982582  | 3       | 0     | 0       | 6       | 0       | 0       | 59 | -0.6506817  | 4       | 0          | 0       | 0       | 3       | 3       | 104 | -0.7008536  | 4       | 0     | 0       | 0       | 9       |         |
| 2  | -1.0982582  | 3       | 0     | 0       | 7       | 0       | 0       | 59 | -0.6506817  | 4       | 0          | 0       | 0       | 9       | 9       | 5   | -0.596579   | 3       | 0     | 0       | 3       | 0       |         |
| 2  | -1.0982582  | 3       | 0     | 0       | 2       | 0       | 0       | 59 | -0.6506817  | 4       | 0          | 0       | 0       | 6       | 6       | 5   | -0.596579   | 3       | 0     | 0       | 0       | 0       |         |
| 2  | -1.0982582  | 3       | 0     | 0       | 12      | 0       | 0       | 59 | -0.6506817  | 4       | 2          | 0       | 0       | 4       | 4       | 5   | -0.596579   | 3       | 0     | 0       | 0       | 0       |         |
| 2  | -1.0982582  | 4       | 0     | 0       | 12      | 12      | 12      | 59 | -0.6506817  | 4       | 2          | 0       | 0       | 5       | 5       | 5   | -0.596579   | 4       | 0     | 0       | 0       | 0       |         |
| 2  | -1.0982582  | 4       | 0     | 0       | 5       | 0       | 0       | 59 | -0.6506817  | 4       | 2          | 0       | 0       | 7       | 7       | 5   | -0.596579   | 4       | 0     | 0       | 0       | 0       |         |
| 2  | -1.0982582  | 3       | 0     | 2       | 6       | 0       | 0       | 59 | -0.6506817  | 1       | 4          | 4       | 0       | 2       | 2       | 105 | -0.02320027 | 3       | 0     | 0       | 0       | 0       |         |
| 2  | -1.0982582  | 4       | 0     | 0       | 2       | 6       | 6       | 59 | -0.6506817  | 1       | 3          | 4       | 0       | 2       | 2       | 105 | -0.02320027 | 4       | 0     | 0       | 0       | 11      |         |
| 3  | -0.2037715  | 2       | 8     | 0       | 0       | 0       | 0       | 59 | -0.6506817  | 1       | 5          | 0       | 0       | 0       | 0       | 105 | 0.02320027  | 4       | 0     | 0       | 0       | 0       |         |
| 3  | -0.2037715  | 2       | 2     | 4       | 0       | 0       | 0       | 59 | -0.6506817  | 4       | 4          | 0       | 0       | 3       | 3       | 105 | 0.02320027  | 3       | 0     | 0       | 0       | 0       |         |
| 3  | -0.2037715  | 3       | 3     | 6       | 0       | 0       | 0       | 59 | -0.6506817  | 4       | 0          | 0       | 0       | 0       | 0       | 105 | 0.02320027  | 3       | 0     | 0       | 5       | 0       |         |
| 3  | -0.2037715  | 3       | 2     | 3       | 2       | 0       | 0       | 59 | -0.6506817  | 1       | 0          | 0       | 0       | 0       | 0       | 105 | 0.02320027  | 1       | 0     | 0       | 0       | 0       |         |
| 3  | -0.2037715  | 3       | 2     | 5       | 0       | 0       | 0       | 59 | -0.6506817  | 1       | 6          | 6       | 0       | 0       | 0       | 105 | 0.02320027  | 1       | 3     | 0       | 0       | 0       |         |
| 3  | -0.2037715  | 3       | 0     | 0       | 7       | 0       | 0       | 59 | -0.6506817  | 1       | 7          | 1       | 0       | 0       | 0       | 105 | 0.02320027  | 4       | 0     | 0       | 9       | 0       |         |
| 3  | -0.2037715  | 3       | 0     | 0       | 3       | 0       | 0       | 59 | -0.6506817  | 1       | 5          | 0       | 0       | 0       | 0       | 63  | -0.4580645  | 1       | 0     | 0       | 0       | 0       |         |
| 3  | -0.2037715  | 3       | 0     | 0       | 0       | 0       | 0       | 59 | -0.6506817  | 1       | 9          | 0       | 0       | 0       | 0       | 63  | -0.4580645  | 3       | 4     | 4       | 0       | 0       |         |
| 3  | -0.2037715  | 2       | 0     | 0       | 0       | 0       | 0       | 59 | -0.6506817  | 1       | 3          | 0       | 0       | 0       | 0       | 63  | -0.4580645  | 3       | 0     | 0       | 0       | 0       |         |
| 3  | -0.2037715  | 2       | 0     | 1       | 0       | 2       | 2       | 59 | -0.6506817  | 4       | 0          | 0       | 0       | 3       | 3       | 63  | -0.4580645  | 3       | 0     | 0       | 6       | 0       |         |
| 3  | -0.2037715  | 3       | 10    | 0       | 0       | 0       | 0       | 60 | 0.26196807  | 1       | 5          | 0       | 0       | 0       | 0       | 63  | -0.4580645  | 3       | 0     | 0       | 8       | 0       |         |
| 3  | -0.2037715  | 3       | 10    | 0       | 0       | 0       | 0       | 60 | 0.26196807  | 4       | 0          | 0       | 0       | 0       | 0       | 88  | -0.088144   | 3       | 3     | 2       | 4       | 0       |         |
| 3  | -0.2037715  | 3       | 1     | 0       | 3       | 3       | 3       | 60 | 0.26196807  | 4       | 0          | 0       | 0       | 0       | 0       | 106 | -0.5067385  | 1       | 0     | 0       | 0       | 0       |         |
| 3  | -0.2037715  | 3       | 1     | 0       | 1       | 5       | 5       | 60 | 0.26196807  | 4       | 0          | 0       | 0       | 11      | 11      | 107 | 0.01269119  | 3       | 0     | 0       | 0       | 0       |         |
| 3  | -0.2037715  | 2       | 0     | 6       | 0       | 0       | 0       | 60 | 0.26196807  | 4       | 0          | 0       | 0       | 8       | 8       | 107 | 0.01269119  | 4       | 1     | 0       | 1       | 3       |         |
| 3  | -0.2037715  | 3       | 4     | 0       | 0       | 0       | 0       | 60 | 0.26196807  | 4       | 0          | 0       | 0       | 2       | 2       | 107 | 0.01269119  | 4       | 2     | 2       | 0       | 2       |         |
| 3  | -0.2037715  | 3       | 10    |         |         |         |         |    |             |         |            |         |         |         |         |     |             |         |       |         |         |         |         |

|   |            |   |   |   |    |    |    |            |   |    |    |    |   |    |            |            |   |    |    |    |   |    |
|---|------------|---|---|---|----|----|----|------------|---|----|----|----|---|----|------------|------------|---|----|----|----|---|----|
| 5 | -0.596579  | 3 | 0 | 0 | 7  | 0  | 5  | -0.596579  | 4 | 3  | 0  | 0  | 5 | 84 | -1.0300019 | 1          | 6 | 0  | 0  | 0  | 0 |    |
| 5 | -0.596579  | 3 | 0 | 0 | 6  | 0  | 5  | -0.596579  | 4 | 4  | 0  | 0  | 0 | 4  | 84         | -1.0300019 | 4 | 1  | 0  | 0  | 1 | 2  |
| 5 | -0.596579  | 3 | 0 | 0 | 9  | 0  | 5  | -0.596579  | 4 | 4  | 0  | 0  | 0 | 3  | 84         | -1.0300019 | 4 | 0  | 0  | 0  | 0 | 13 |
| 5 | -0.596579  | 3 | 0 | 0 | 10 | 0  | 5  | -0.596579  | 4 | 3  | 0  | 0  | 0 | 3  | 84         | -1.0300019 | 4 | 0  | 0  | 0  | 0 | 2  |
| 5 | -0.596579  | 3 | 0 | 0 | 9  | 1  | 5  | -0.596579  | 3 | 0  | 0  | 0  | 0 | 0  | 84         | -1.0300019 | 4 | 0  | 0  | 0  | 3 | 4  |
| 5 | -0.596579  | 4 | 0 | 0 | 1  | 8  | 5  | -0.596579  | 4 | 7  | 0  | 0  | 0 | 0  | 84         | -1.0300019 | 4 | 0  | 0  | 0  | 1 | 7  |
| 5 | -0.596579  | 4 | 0 | 0 | 0  | 9  | 5  | -0.596579  | 1 | 6  | 0  | 0  | 0 | 0  | 84         | -1.0300019 | 4 | 1  | 0  | 0  | 3 | 6  |
| 5 | -0.596579  | 4 | 0 | 0 | 2  | 8  | 5  | -0.596579  | 1 | 9  | 0  | 0  | 0 | 0  | 84         | -1.0300019 | 4 | 4  | 0  | 0  | 2 | 1  |
| 5 | -0.596579  | 4 | 0 | 0 | 0  | 7  | 13 | -0.6454721 | 1 | 6  | 2  | 0  | 0 | 0  | 84         | -1.0300019 | 4 | 0  | 0  | 0  | 2 | 5  |
| 6 | 0.04574931 | 1 | 4 | 0 | 4  | 0  | 13 | -0.6454721 | 1 | 9  | 0  | 0  | 0 | 0  | 108        | -0.0297885 | 4 | 0  | 0  | 0  | 2 | 2  |
| 6 | 0.04574931 | 3 | 0 | 0 | 7  | 0  | 13 | -0.6454721 | 1 | 9  | 0  | 0  | 0 | 0  | 108        | -0.0297885 | 2 | 2  | 1  | 1  | 1 | 3  |
| 6 | 0.04574931 | 3 | 0 | 0 | 12 | 0  | 13 | -0.6454721 | 1 | 7  | 0  | 0  | 0 | 0  | 108        | -0.0297885 | 4 | 0  | 1  | 4  | 0 | 0  |
| 6 | 0.04574931 | 4 | 0 | 0 | 0  | 8  | 13 | -0.6454721 | 1 | 6  | 2  | 0  | 0 | 0  | 108        | -0.0297885 | 4 | 0  | 0  | 0  | 2 | 4  |
| 6 | 0.04574931 | 4 | 0 | 0 | 1  | 8  | 13 | -0.6454721 | 1 | 2  | 3  | 0  | 0 | 2  | 108        | -0.0297885 | 1 | 2  | 0  | 0  | 1 | 3  |
| 6 | 0.04574931 | 4 | 0 | 0 | 0  | 9  | 13 | -0.6454721 | 1 | 1  | 1  | 0  | 0 | 0  | 108        | -0.0297885 | 1 | 2  | 0  | 0  | 1 | 6  |
| 6 | 0.04574931 | 4 | 0 | 0 | 1  | 4  | 13 | -0.6454721 | 4 | 0  | 0  | 0  | 0 | 4  | 108        | -0.0297885 | 1 | 0  | 1  | 3  | 3 | 3  |
| 7 | 0.33864873 | 1 | 2 | 4 | 0  | 0  | 64 | -0.5598805 | 1 | 9  | 0  | 0  | 0 | 0  | 108        | -0.0297885 | 4 | 0  | 0  | 1  | 3 | 3  |
| 7 | 0.33864873 | 1 | 3 | 3 | 5  | 0  | 64 | -0.5598805 | 2 | 0  | 9  | 0  | 0 | 0  | 108        | -0.0297885 | 1 | 12 | 1  | 0  | 0 | 0  |
| 7 | 0.33864873 | 2 | 0 | 4 | 0  | 0  | 64 | -0.5598805 | 2 | 2  | 0  | 0  | 0 | 5  | 108        | -0.0297885 | 2 | 0  | 13 | 0  | 0 | 0  |
| 7 | 0.33864873 | 3 | 0 | 0 | 12 | 0  | 64 | -0.5598805 | 1 | 5  | 0  | 0  | 0 | 0  | 108        | -0.0297885 | 2 | 0  | 7  | 1  | 0 | 0  |
| 7 | 0.33864873 | 3 | 0 | 0 | 9  | 0  | 64 | -0.5598805 | 1 | 3  | 0  | 0  | 0 | 0  | 108        | -0.0297885 | 3 | 0  | 0  | 2  | 0 | 0  |
| 7 | 0.33864873 | 3 | 0 | 0 | 5  | 0  | 65 | -0.5017981 | 4 | 0  | 2  | 0  | 0 | 3  | 108        | -0.0297885 | 3 | 0  | 0  | 10 | 0 | 0  |
| 7 | 0.33864873 | 3 | 0 | 0 | 0  | 11 | 65 | -0.5017981 | 4 | 5  | 0  | 0  | 0 | 4  | 108        | -0.0297885 | 3 | 0  | 0  | 6  | 0 | 0  |
| 7 | 0.33864873 | 4 | 0 | 0 | 1  | 6  | 66 | -0.9346919 | 1 | 15 | 0  | 0  | 0 | 0  | 108        | -0.0297885 | 1 | 7  | 0  | 0  | 0 | 0  |
| 7 | 0.33864873 | 4 | 0 | 0 | 2  | 6  | 66 | -0.9346919 | 2 | 0  | 4  | 0  | 0 | 0  | 108        | -0.0297885 | 3 | 2  | 0  | 2  | 1 | 0  |
| 8 | 0.20181715 | 3 | 0 | 0 | 0  | 0  | 66 | -0.9346919 | 1 | 13 | 13 | 0  | 0 | 0  | 108        | -0.0297885 | 4 | 0  | 0  | 0  | 3 | 7  |
| 8 | 0.20181715 | 3 | 0 | 0 | 0  | 0  | 66 | -0.9346919 | 1 | 0  | 4  | 0  | 0 | 0  | 108        | -0.0297885 | 4 | 0  | 0  | 1  | 2 | 0  |
| 8 | 0.20181715 | 3 | 0 | 0 | 0  | 0  | 66 | -0.9346919 | 1 | 0  | 0  | 5  | 0 | 0  | 108        | -0.0297885 | 4 | 1  | 0  | 1  | 5 | 0  |
| 8 | 0.20181715 | 2 | 0 | 0 | 3  | 0  | 66 | -0.9346919 | 1 | 0  | 0  | 4  | 0 | 0  | 108        | -0.0297885 | 4 | 1  | 0  | 2  | 2 | 0  |
| 8 | 0.20181715 | 2 | 0 | 0 | 0  | 0  | 66 | -0.9346919 | 1 | 4  | 0  | 4  | 0 | 0  | 108        | -0.0297885 | 4 | 2  | 0  | 0  | 0 | 5  |
| 8 | 0.20181715 | 2 | 0 | 0 | 0  | 0  | 66 | -0.9346919 | 1 | 0  | 0  | 0  | 0 | 0  | 109        | 0.13340497 | 4 | 0  | 0  | 0  | 0 | 6  |
| 8 | 0.20181715 | 2 | 0 | 9 | 0  | 0  | 66 | -0.9346919 | 1 | 0  | 0  | 0  | 0 | 0  | 109        | 0.13340497 | 4 | 0  | 0  | 0  | 0 | 0  |
| 8 | 0.20181715 | 3 | 0 | 8 | 0  | 0  | 66 | -0.9346919 | 1 | 2  | 0  | 0  | 0 | 0  | 109        | 0.13340497 | 4 | 0  | 0  | 0  | 0 | 0  |
| 8 | 0.20181715 | 3 | 0 | 9 | 0  | 0  | 66 | -0.9346919 | 1 | 0  | 0  | 4  | 4 | 0  | 109        | 0.13340497 | 1 | 2  | 0  | 1  | 2 | 0  |
| 8 | 0.20181715 | 3 | 0 | 0 | 0  | 0  | 66 | -0.9346919 | 1 | 5  | 3  | 0  | 0 | 0  | 109        | 0.13340497 | 4 | 3  | 0  | 1  | 3 | 0  |
| 8 | 0.20181715 | 3 | 0 | 0 | 0  | 0  | 66 | -0.9346919 | 1 | 5  | 0  | 0  | 0 | 0  | 109        | 0.13340497 | 4 | 2  | 0  | 0  | 0 | 7  |
| 8 | 0.20181715 | 3 | 0 | 0 | 7  | 0  | 66 | -0.9346919 | 1 | 0  | 0  | 0  | 0 | 0  | 109        | 0.13340497 | 4 | 1  | 0  | 0  | 0 | 5  |
| 8 | 0.20181715 | 3 | 0 | 0 | 0  | 0  | 66 | -0.9346919 | 1 | 7  | 0  | 0  | 0 | 0  | 109        | 0.13340497 | 2 | 1  | 1  | 0  | 0 | 4  |
| 8 | 0.20181715 | 3 | 0 | 8 | 0  | 0  | 66 | -0.9346919 | 1 | 0  | 0  | 0  | 0 | 0  | 109        | 0.13340497 | 3 | 0  | 0  | 0  | 0 | 8  |
| 8 | 0.20181715 | 3 | 0 | 0 | 0  | 0  | 66 | -0.9346919 | 1 | 4  | 0  | 0  | 0 | 0  | 109        | 0.13340497 | 1 | 5  | 2  | 0  | 0 | 0  |
| 8 | 0.20181715 | 3 | 0 | 0 | 0  | 0  | 66 | -0.9346919 | 1 | 9  | 0  | 0  | 0 | 0  | 109        | 0.13340497 | 1 | 6  | 1  | 0  | 0 | 0  |
| 8 | 0.20181715 | 3 | 0 | 0 | 0  | 0  | 66 | -0.9346919 | 1 | 11 | 0  | 0  | 0 | 0  | 109        | 0.13340497 | 4 | 0  | 0  | 1  | 4 | 0  |
| 8 | 0.20181715 | 3 | 0 | 0 | 0  | 0  | 66 | -0.9346919 | 1 | 0  | 0  | 0  | 0 | 0  | 109        | 0.13340497 | 4 | 0  | 0  | 0  | 0 | 8  |
| 8 | 0.20181715 | 3 | 0 | 4 | 2  | 4  | 66 | -0.9346919 | 1 | 0  | 0  | 0  | 0 | 0  | 109        | 0.13340497 | 3 | 0  | 0  | 0  | 0 | 5  |
| 8 | 0.20181715 | 3 | 0 | 0 | 0  | 0  | 66 | -0.9346919 | 1 | 0  | 0  | 0  | 0 | 0  | 109        | 0.13340497 | 3 | 0  | 0  | 0  | 0 | 8  |
| 8 | 0.20181715 | 3 | 0 | 0 | 0  | 0  | 67 | 0.28948928 | 1 | 3  | 0  | 2  | 0 | 0  | 109        | 0.13340497 | 4 | 0  | 0  | 0  | 0 | 3  |
| 8 | 0.20181715 | 3 | 0 | 0 | 10 | 0  | 67 | 0.28948928 | 1 | 0  | 0  | 0  | 0 | 0  | 109        | 0.13340497 | 4 | 0  | 0  | 0  | 0 | 3  |
| 8 | 0.20181715 | 3 | 0 | 0 | 4  | 4  | 67 | 0.28948928 | 1 | 0  | 0  | 0  | 0 | 0  | 109        | 0.13340497 | 4 | 0  | 0  | 5  | 4 | 0  |
| 8 | 0.20181715 | 2 | 0 | 3 | 0  | 0  | 67 | 0.28948928 | 1 | 6  | 0  | 0  | 0 | 0  | 109        | 0.13340497 | 3 | 0  | 0  | 7  | 0 | 0  |
| 8 | 0.20181715 | 2 | 0 | 0 | 0  | 0  | 67 | 0.28948928 | 1 | 9  | 0  | 0  | 0 | 0  | 109        | 0.13340497 | 3 | 0  | 0  | 4  | 0 | 0  |
| 8 | 0.20181715 | 2 | 0 | 9 | 0  | 0  | 67 | 0.28948928 | 1 | 0  | 0  | 0  | 0 | 0  | 109        | 0.13340497 | 3 | 0  | 0  | 0  | 0 | 10 |
| 8 | 0.20181715 | 2 | 0 | 0 | 10 | 0  | 67 | 0.28948928 | 1 | 0  | 0  | 0  | 0 | 0  | 109        | 0.13340497 | 1 | 6  | 0  | 0  | 0 | 0  |
| 8 | 0.20181715 | 2 | 0 | 2 | 5  | 0  | 67 | 0.28948928 | 1 | 0  | 0  | 0  | 0 | 0  | 109        | 0.13340497 | 1 | 4  | 0  | 2  | 0 | 0  |
| 8 | 0.20181715 | 2 | 0 | 0 | 0  | 0  | 68 | -0.6331251 | 3 | 0  | 0  | 0  | 0 | 0  | 109        | 0.13340497 | 4 | 1  | 0  | 0  | 3 | 3  |
| 8 | 0.20181715 | 3 | 0 | 0 | 4  | 0  | 68 | -0.6331251 | 3 | 0  | 0  | 6  | 0 | 0  | 109        | 0.13340497 | 4 | 0  | 0  | 2  | 7 | 0  |
| 8 | 0.20181715 | 2 | 0 | 4 | 2  | 0  | 68 | -0.6331251 | 3 | 0  | 0  | 0  | 0 | 0  | 109        | 0.13340497 | 4 | 0  | 0  | 2  | 4 | 0  |
| 8 | 0.20181715 | 2 | 0 | 0 | 10 | 0  | 68 | -0.6331251 | 3 | 0  | 0  | 6  | 0 | 0  | 109        | 0.13340497 | 4 | 0  | 0  | 0  | 0 | 0  |
| 8 | 0.20181715 | 2 | 0 | 0 | 10 | 0  | 68 | -0.6331251 | 2 | 0  | 0  | 5  | 0 | 0  | 109        | 0.13340497 | 4 | 2  | 0  | 2  | 3 | 0  |
| 8 | 0.20181715 | 2 | 0 | 0 | 4  | 0  | 68 | -0.6331251 | 3 | 0  | 0  | 6  | 0 | 0  | 109        | 0.13340497 | 4 | 2  | 0  | 0  | 0 | 7  |
| 8 | 0.20181715 | 2 | 0 | 0 | 1  | 1  | 68 | -0.6331251 | 3 | 0  | 0  | 4  | 0 | 0  | 109        | 0.13340497 | 4 | 0  | 0  | 3  | 7 | 0  |
| 8 | 0.20181715 | 2 | 0 | 0 | 4  | 0  | 68 | -0.6331251 | 3 | 0  | 0  | 0  | 0 | 0  | 109        | 0.13340497 | 4 | 0  | 0  | 0  | 0 | 4  |
| 8 | 0.20181715 | 3 | 0 | 0 | 4  | 0  | 68 | -0.6331251 | 3 | 0  | 0  | 9  | 0 | 0  | 109        | 0.13340497 | 4 | 0  | 0  | 0  | 0 | 0  |
| 8 | 0.20181715 | 3 | 0 | 0 | 6  | 0  | 68 | -0.6331251 | 3 | 0  | 0  | 0  | 0 | 0  | 110        | -0.2786646 | 4 | 0  | 0  | 0  | 0 | 12 |
| 8 | 0.20181715 | 2 | 0 | 0 | 0  | 8  | 68 | -0.6331251 | 3 | 0  | 0  | 7  | 0 | 0  | 110        | -0.2786646 | 1 | 2  | 0  | 1  | 2 | 0  |
| 8 | 0.20181715 | 4 | 0 | 0 | 0  | 7  | 68 | -0.6331251 | 3 | 0  | 0  | 11 | 0 | 0  | 110        | -0.2786646 | 1 | 2  | 1  | 1  | 3 | 3  |
| 8 | 0.20181715 | 1 | 0 | 0 | 0  | 14 | 68 | -0.6331251 | 3 | 0  | 0  | 0  | 0 | 0  | 110        | -0.2786646 | 4 | 0  | 0  | 1  | 2 | 0  |
| 8 | 0.20181715 | 2 | 0 | 0 | 0  | 4  | 68 | -0.6331251 | 3 | 0  | 0  | 6  | 2 | 0  | 110        | -0.2786646 | 1 | 5  | 0  | 0  | 1 | 2  |
| 8 | 0.20181715 | 4 | 0 | 0 | 7  | 0  | 68 | -0.6331251 | 3 | 0  | 0  | 0  | 0 | 0  | 110        | -0.2786646 | 1 | 4  | 0  | 1  | 3 | 0  |
| 9 | 0.12832241 | 2 | 0 | 0 | 0  | 0  | 68 | -0.6331251 | 3 | 0  | 0  | 6  | 0 | 0  | 110        | -0.2786646 | 4 | 0  | 0  | 0  | 0 | 3  |
| 9 | 0.12832241 | 2 | 0 | 0 | 0  | 0  | 68 | -0.6331251 | 3 | 0  | 0  | 7  | 0 | 0  | 110        | -0.2786646 | 4 | 1  | 0  | 0  | 0 | 0  |
| 9 | 0.12832241 | 2 | 0 | 0 | 0  | 0  | 68 | -0.6331251 | 3 | 0  | 0  | 0  | 5 | 0  | 110        | -0.2786646 | 4 | 1  | 0  | 0  | 0 | 0  |
| 9 | 0.12832241 | 2 | 0 | 0 | 0  | 0  | 68 | -0.6331251 | 3 | 0  | 0  | 2  | 5 | 0  | 110        | -0.2786646 | 1 | 3  | 0  | 0  | 0 | 4  |
| 9 | 0.12832241 | 2 | 0 | 0 | 0  | 0  | 68 | -0.6331251 | 1 | 0  | 0  | 12 |   |    |            |            |   |    |    |    |   |    |

|    |            |   |    |   |   |    |    |            |   |   |   |    |    |     |            |   |   |   |   |    |   |
|----|------------|---|----|---|---|----|----|------------|---|---|---|----|----|-----|------------|---|---|---|---|----|---|
| 11 | -0.776814  | 4 | 0  | 0 | 0 | 7  | 70 | -0.1830321 | 4 | 0 | 0 | 0  | 9  | 113 | -0.3337907 | 3 | 0 | 0 | 5 | 0  | 0 |
| 11 | -0.776814  | 3 | 0  | 0 | 2 | 3  | 70 | -0.1830321 | 4 | 0 | 0 | 0  | 0  | 113 | -0.3337907 | 1 | 7 | 0 | 0 | 0  | 0 |
| 11 | -0.776814  | 2 | 0  | 0 | 0 | 0  | 70 | -0.1830321 | 1 | 0 | 0 | 0  | 0  | 113 | -0.3337907 | 1 | 2 | 0 | 1 | 2  | 5 |
| 11 | -0.776814  | 2 | 0  | 0 | 0 | 0  | 70 | -0.1830321 | 4 | 0 | 0 | 0  | 0  | 114 | -0.4855974 | 4 | 0 | 0 | 1 | 6  | 0 |
| 12 | 0.03251334 | 2 | 0  | 8 | 3 | 0  | 70 | -0.1830321 | 4 | 0 | 0 | 0  | 4  | 114 | -0.4855974 | 1 | 0 | 0 | 2 | 5  | 0 |
| 12 | 0.03251334 | 2 | 2  | 2 | 1 | 0  | 70 | -0.1830321 | 4 | 0 | 0 | 0  | 4  | 114 | -0.4855974 | 3 | 1 | 0 | 1 | 4  | 5 |
| 12 | 0.03251334 | 2 | 6  | 0 | 0 | 0  | 70 | -0.1830321 | 4 | 0 | 0 | 0  | 0  | 114 | -0.4855974 | 4 | 0 | 0 | 2 | 5  | 0 |
| 12 | 0.03251334 | 1 | 9  | 0 | 0 | 0  | 70 | -0.1830321 | 4 | 0 | 0 | 0  | 11 | 114 | -0.4855974 | 4 | 1 | 0 | 0 | 6  | 6 |
| 12 | 0.03251334 | 1 | 0  | 0 | 3 | 0  | 70 | -0.1830321 | 4 | 0 | 0 | 0  | 6  | 114 | -0.4855974 | 3 | 0 | 0 | 1 | 10 | 0 |
| 12 | 0.03251334 | 1 | 4  | 0 | 0 | 2  | 70 | -0.1830321 | 1 | 0 | 0 | 0  | 0  | 114 | -0.4855974 | 4 | 0 | 0 | 1 | 6  | 0 |
| 12 | 0.03251334 | 1 | 13 | 0 | 0 | 0  | 70 | -0.1830321 | 1 | 0 | 0 | 0  | 0  | 114 | -0.4855974 | 2 | 0 | 6 | 1 | 0  | 0 |
| 12 | 0.03251334 | 1 | 5  | 0 | 0 | 0  | 70 | -0.1830321 | 4 | 0 | 0 | 0  | 9  | 114 | -0.4855974 | 4 | 0 | 0 | 0 | 9  | 0 |
| 12 | 0.03251334 | 4 | 3  | 0 | 4 | 0  | 70 | -0.1830321 | 4 | 0 | 0 | 0  | 6  | 114 | -0.4855974 | 4 | 0 | 0 | 0 | 8  | 0 |
| 12 | 0.03251334 | 1 | 8  | 0 | 0 | 0  | 70 | -0.1830321 | 4 | 0 | 0 | 0  | 0  | 114 | -0.4855974 | 3 | 0 | 0 | 2 | 8  | 0 |
| 12 | 0.03251334 | 1 | 4  | 0 | 1 | 2  | 70 | -0.1830321 | 4 | 0 | 0 | 0  | 6  | 114 | -0.4855974 | 4 | 0 | 0 | 0 | 12 | 0 |
| 12 | 0.03251334 | 1 | 6  | 0 | 1 | 0  | 70 | -0.1830321 | 4 | 0 | 0 | 0  | 6  | 114 | -0.4855974 | 3 | 0 | 0 | 2 | 5  | 0 |
| 12 | 0.03251334 | 1 | 3  | 4 | 1 | 0  | 70 | -0.1830321 | 4 | 0 | 0 | 0  | 11 | 114 | -0.4855974 | 4 | 0 | 0 | 0 | 5  | 0 |
| 12 | 0.03251334 | 1 | 2  | 0 | 0 | 2  | 70 | -0.1830321 | 4 | 0 | 0 | 0  | 0  | 114 | -0.4855974 | 4 | 0 | 0 | 3 | 3  | 0 |
| 12 | 0.03251334 | 1 | 2  | 0 | 2 | 5  | 70 | -0.1830321 | 4 | 0 | 0 | 0  | 0  | 114 | -0.4855974 | 4 | 0 | 0 | 4 | 4  | 0 |
| 12 | 0.03251334 | 1 | 7  | 0 | 2 | 0  | 70 | -0.1830321 | 4 | 8 | 0 | 0  | 0  | 114 | -0.4855974 | 4 | 0 | 0 | 1 | 3  | 0 |
| 12 | 0.03251334 | 4 | 3  | 0 | 1 | 1  | 70 | -0.1830321 | 4 | 8 | 0 | 0  | 0  | 114 | -0.4855974 | 4 | 0 | 0 | 0 | 5  | 0 |
| 12 | 0.03251334 | 4 | 0  | 0 | 1 | 4  | 70 | -0.1830321 | 2 | 4 | 4 | 0  | 0  | 114 | -0.4855974 | 4 | 0 | 0 | 2 | 8  | 0 |
| 12 | 0.03251334 | 1 | 4  | 0 | 0 | 3  | 70 | -0.1830321 | 3 | 0 | 0 | 10 | 0  | 114 | -0.4855974 | 4 | 2 | 0 | 3 | 4  | 0 |
| 12 | 0.03251334 | 4 | 0  | 0 | 0 | 3  | 70 | -0.1830321 | 4 | 0 | 0 | 10 | 10 | 114 | -0.4855974 | 1 | 2 | 0 | 2 | 0  | 0 |
| 12 | 0.03251334 | 4 | 0  | 0 | 0 | 11 | 70 | -0.1830321 | 4 | 0 | 0 | 0  | 0  | 114 | -0.4855974 | 4 | 0 | 0 | 0 | 11 | 0 |
| 12 | 0.03251334 | 1 | 4  | 0 | 3 | 0  | 70 | -0.1830321 | 4 | 0 | 0 | 0  | 13 | 114 | -0.6635707 | 4 | 0 | 1 | 1 | 5  | 0 |
| 12 | 0.03251334 | 1 | 2  | 0 | 0 | 7  | 70 | -0.1830321 | 4 | 0 | 0 | 0  | 8  | 115 | -0.6635707 | 2 | 1 | 4 | 0 | 0  | 0 |
| 12 | 0.03251334 | 1 | 5  | 0 | 0 | 3  | 70 | -0.1830321 | 4 | 7 | 0 | 0  | 0  | 115 | -0.6635707 | 4 | 3 | 0 | 2 | 2  | 0 |
| 12 | 0.03251334 | 1 | 6  | 0 | 0 | 0  | 4  | 5.8324324  | 4 | 0 | 0 | 0  | 7  | 115 | -0.6635707 | 4 | 0 | 0 | 0 | 7  | 0 |
| 12 | 0.03251334 | 1 | 10 | 0 | 0 | 0  | 4  | 5.8324324  | 4 | 0 | 0 | 0  | 7  | 115 | -0.6635707 | 4 | 1 | 1 | 0 | 1  | 0 |
| 12 | 0.03251334 | 1 | 0  | 0 | 0 | 0  | 4  | 5.8324324  | 4 | 0 | 0 | 0  | 7  | 115 | -0.6635707 | 4 | 0 | 0 | 0 | 3  | 0 |
| 12 | 0.03251334 | 1 | 0  | 0 | 3 | 7  | 4  | 5.8324324  | 4 | 0 | 0 | 2  | 2  | 115 | -0.6635707 | 4 | 0 | 0 | 2 | 2  | 0 |
| 12 | 0.03251334 | 4 | 0  | 0 | 0 | 7  | 4  | 5.8324324  | 4 | 0 | 0 | 0  | 0  | 115 | -0.6635707 | 3 | 0 | 0 | 0 | 5  | 0 |
| 12 | 0.03251334 | 4 | 0  | 0 | 0 | 4  | 4  | 5.8324324  | 4 | 0 | 0 | 0  | 0  | 58  | 0.44441689 | 4 | 0 | 1 | 1 | 6  | 0 |
| 12 | 0.03251334 | 4 | 0  | 2 | 0 | 9  | 4  | 5.8324324  | 4 | 0 | 0 | 0  | 0  | 58  | 0.44441689 | 4 | 0 | 1 | 2 | 2  | 0 |
| 12 | 0.03251334 | 4 | 0  | 2 | 0 | 4  | 4  | 5.8324324  | 2 | 0 | 8 | 0  | 0  | 58  | 0.44441689 | 4 | 0 | 0 | 1 | 2  | 0 |
| 12 | 0.03251334 | 4 | 3  | 0 | 0 | 5  | 4  | 5.8324324  | 2 | 0 | 5 | 0  | 0  | 58  | 0.44441689 | 5 | 0 | 1 | 1 | 0  | 0 |
| 12 | 0.03251334 | 2 | 0  | 0 | 0 | 0  | 4  | 5.8324324  | 2 | 0 | 2 | 0  | 0  | 58  | 0.44441689 | 1 | 2 | 0 | 0 | 4  | 0 |
| 13 | -0.6454721 | 3 | 0  | 7 | 3 | 0  | 4  | 5.8324324  | 4 | 0 | 0 | 0  | 0  | 58  | 0.44441689 | 4 | 3 | 0 | 1 | 2  | 0 |
| 13 | -0.6454721 | 3 | 3  | 3 | 0 | 0  | 4  | 5.8324324  | 4 | 0 | 0 | 0  | 0  | 58  | 0.44441689 | 4 | 0 | 0 | 0 | 6  | 0 |
| 13 | -0.6454721 | 3 | 0  | 9 | 0 | 0  | 4  | 5.8324324  | 4 | 0 | 0 | 0  | 0  | 58  | 0.44441689 | 4 | 1 | 0 | 0 | 5  | 0 |
| 13 | -0.6454721 | 1 | 4  | 0 | 0 | 0  | 4  | 5.8324324  | 4 | 3 | 0 | 0  | 0  | 58  | 0.44441689 | 4 | 1 | 3 | 0 | 1  | 0 |
| 13 | -0.6454721 | 4 | 0  | 0 | 1 | 0  | 4  | 5.8324324  | 4 | 6 | 0 | 0  | 0  | 58  | 0.44441689 | 4 | 0 | 1 | 0 | 1  | 0 |
| 13 | -0.6454721 | 4 | 0  | 0 | 6 | 0  | 4  | 5.8324324  | 4 | 2 | 1 | 0  | 2  | 58  | 0.44441689 | 4 | 0 | 0 | 2 | 6  | 0 |
| 13 | -0.6454721 | 4 | 0  | 0 | 0 | 4  | 4  | 5.8324324  | 4 | 0 | 0 | 4  | 6  | 58  | 0.44441689 | 4 | 0 | 0 | 2 | 10 | 0 |
| 13 | -0.6454721 | 3 | 0  | 0 | 4 | 2  | 4  | 5.8324324  | 4 | 0 | 0 | 0  | 9  | 58  | 0.44441689 | 3 | 1 | 0 | 1 | 4  | 0 |
| 13 | -0.6454721 | 3 | 4  | 0 | 2 | 0  | 4  | 5.8324324  | 4 | 0 | 0 | 3  | 8  | 58  | 0.44441689 | 4 | 0 | 0 | 1 | 12 | 0 |
| 13 | -0.6454721 | 4 | 4  | 0 | 1 | 1  | 4  | 5.8324324  | 4 | 0 | 0 | 0  | 8  | 58  | 0.44441689 | 4 | 0 | 0 | 4 | 0  | 0 |
| 13 | -0.6454721 | 4 | 8  | 0 | 0 | 0  | 4  | 5.8324324  | 1 | 8 | 0 | 0  | 0  | 58  | 0.44441689 | 3 | 0 | 0 | 1 | 9  | 0 |
| 13 | -0.6454721 | 4 | 0  | 0 | 0 | 8  | 4  | 5.8324324  | 4 | 0 | 0 | 0  | 8  | 58  | 0.44441689 | 4 | 0 | 0 | 0 | 11 | 0 |
| 13 | -0.6454721 | 4 | 3  | 0 | 0 | 6  | 4  | 5.8324324  | 4 | 5 | 0 | 0  | 0  | 58  | 0.44441689 | 4 | 0 | 0 | 0 | 7  | 0 |
| 13 | -0.6454721 | 3 | 0  | 4 | 0 | 0  | 60 | 0.26196807 | 2 | 2 | 0 | 0  | 3  | 58  | 0.44441689 | 4 | 0 | 0 | 0 | 9  | 0 |
| 13 | -0.6454721 | 4 | 0  | 0 | 0 | 5  | 60 | 0.26196807 | 1 | 0 | 0 | 0  | 0  | 116 | -0.3189659 | 4 | 0 | 0 | 2 | 6  | 0 |
| 13 | -0.6454721 | 4 | 0  | 0 | 3 | 9  | 60 | 0.26196807 | 2 | 0 | 5 | 0  | 0  | 116 | -0.3189659 | 3 | 0 | 0 | 2 | 9  | 0 |
| 13 | -0.6454721 | 4 | 0  | 0 | 1 | 6  | 60 | 0.26196807 | 2 | 0 | 6 | 0  | 0  | 116 | -0.3189659 | 4 | 0 | 2 | 2 | 3  | 0 |
| 13 | -0.6454721 | 4 | 0  | 0 | 0 | 8  | 60 | 0.26196807 | 2 | 8 | 0 | 0  | 0  | 116 | -0.3189659 | 4 | 0 | 0 | 0 | 8  | 0 |
| 13 | -0.6454721 | 4 | 0  | 0 | 0 | 8  | 60 | 0.26196807 | 2 | 0 | 6 | 0  | 0  | 116 | -0.3189659 | 4 | 0 | 0 | 0 | 0  | 0 |
| 13 | -0.6454721 | 2 | 0  | 0 | 9 | 0  | 60 | 0.26196807 | 1 | 0 | 0 | 0  | 0  | 116 | -0.3189659 | 4 | 0 | 0 | 0 | 4  | 1 |
| 13 | -0.6454721 | 2 | 0  | 0 | 6 | 0  | 60 | 0.26196807 | 1 | 0 | 0 | 0  | 0  | 116 | -0.3189659 | 4 | 0 | 0 | 0 | 4  | 0 |
| 13 | -0.6454721 | 2 | 0  | 0 | 9 | 0  | 60 | 0.26196807 | 1 | 0 | 0 | 0  | 0  | 116 | -0.3189659 | 4 | 0 | 0 | 0 | 4  | 0 |
| 13 | -0.6454721 | 2 | 0  | 0 | 5 | 0  | 60 | 0.26196807 | 1 | 0 | 0 | 0  | 0  | 116 | -0.3189659 | 4 | 0 | 0 | 0 | 6  | 1 |
| 13 | -0.6454721 | 2 | 0  | 0 | 1 | 4  | 60 | 0.26196807 | 1 | 0 | 0 | 0  | 0  | 116 | -0.3189659 | 3 | 0 | 0 | 3 | 0  | 0 |
| 14 | 0.29399424 | 4 | 2  | 0 | 0 | 0  | 60 | 0.26196807 | 1 | 0 | 0 | 0  | 0  | 116 | -0.3189659 | 4 | 1 | 0 | 2 | 8  | 0 |
| 14 | 0.29399424 | 2 | 0  | 4 | 2 | 0  | 60 | 0.26196807 | 1 | 0 | 0 | 0  | 5  | 116 | -0.3189659 | 4 | 0 | 0 | 2 | 5  | 0 |
| 14 | 0.29399424 | 1 | 8  | 0 | 0 | 1  | 60 | 0.26196807 | 4 | 0 | 0 | 0  | 5  | 116 | -0.3189659 | 4 | 0 | 0 | 1 | 5  | 0 |
| 14 | 0.29399424 | 1 | 5  | 0 | 1 | 2  | 60 | 0.26196807 | 4 | 0 | 0 | 0  | 8  | 116 | -0.3189659 | 4 | 0 | 0 | 7 | 3  | 0 |
| 14 | 0.29399424 | 1 | 2  | 0 | 0 | 3  | 60 | 0.26196807 | 1 | 3 | 0 | 0  | 0  | 116 | -0.3189659 | 4 | 0 | 0 | 1 | 5  | 0 |
| 14 | 0.29399424 | 4 | 0  | 0 | 0 | 0  | 60 | 0.26196807 | 1 | 0 | 0 | 0  | 0  | 116 | -0.3189659 | 4 | 1 | 0 | 1 | 6  | 0 |
| 14 | 0.29399424 | 4 | 0  | 0 | 0 | 4  | 60 | 0.26196807 | 1 | 0 | 9 | 0  | 0  | 116 | -0.3189659 | 4 | 0 | 0 | 0 | 7  | 0 |
| 14 | 0.29399424 | 4 | 0  | 0 | 1 | 5  | 60 | 0.26196807 | 4 | 0 | 0 | 0  | 0  | 117 | -0.4636981 | 4 | 0 | 0 | 1 | 6  | 0 |
| 14 | 0.29399424 | 1 | 0  | 0 | 0 | 0  | 60 | 0.26196807 | 4 | 0 | 0 | 0  | 9  | 117 | -0.4636981 | 4 | 1 | 0 | 2 | 5  | 0 |
| 14 | 0.29399424 | 4 | 0  | 0 | 0 | 6  | 60 | 0.26196807 | 1 | 0 | 0 | 0  | 6  | 117 | -0.4636981 | 4 | 2 | 0 | 0 | 5  | 0 |
| 14 | 0.29399424 | 4 | 0  | 0 | 8 | 0  | 60 | 0.26196807 | 1 | 5 | 4 | 0  | 0  | 117 | -0.4636981 | 4 | 2 | 0 | 0 | 5  | 0 |
| 14 | 0.29399424 | 4 | 0  | 0 | 0 | 4  | 60 | 0.26196807 | 1 | 0 | 0 | 0  | 0  | 117 | -0.4636981 | 4 | 0 | 4 | 0 | 2  | 0 |
| 14 | 0.29399424 | 4 | 0  | 0 | 0 | 8  | 60 | 0.26196807 | 3 | 0 | 0 | 0  | 7  | 117 | -0.4636981 | 2 | 0 | 3 | 1 | 4  |   |

|    |            |   |    |   |    |   |    |            |   |    |   |      |   |     |            |   |    |   |   |   |    |
|----|------------|---|----|---|----|---|----|------------|---|----|---|------|---|-----|------------|---|----|---|---|---|----|
| 15 | 0.14608837 | 3 | 0  | 0 | 5  | 0 | 72 | 0.02524535 | 1 | 8  | 0 | 0    | 0 | 120 | 0.26063918 | 4 | 0  | 0 | 0 | 1 | 5  |
| 15 | 0.14608837 | 3 | 0  | 0 | 3  | 0 | 72 | 0.02524535 | 1 | 5  | 0 | 0    | 0 | 120 | 0.26063918 | 4 | 0  | 0 | 0 | 0 | 5  |
| 15 | 0.14608837 | 3 | 0  | 0 | 4  | 0 | 72 | 0.02524535 | 4 | 5  | 0 | 0    | 0 | 120 | 0.26063918 | 4 | 0  | 0 | 0 | 1 | 5  |
| 15 | 0.14608837 | 1 | 1  | 0 | 7  | 0 | 73 | -1.1141344 | 3 | 3  | 0 | 0    | 0 | 120 | 0.26063918 | 3 | 0  | 0 | 0 | 0 | 12 |
| 15 | 0.14608837 | 3 | 9  | 0 | 3  | 0 | 73 | -1.1141344 | 3 | 0  | 0 | 4    | 0 | 120 | 0.26063918 | 3 | 0  | 0 | 1 | 5 | 0  |
| 15 | 0.14608837 | 1 | 6  | 0 | 0  | 0 | 73 | -1.1141344 | 1 | 0  | 0 | 0    | 0 | 120 | 0.26063918 | 3 | 0  | 0 | 0 | 0 | 4  |
| 15 | 0.14608837 | 3 | 0  | 0 | 0  | 9 | 73 | -1.1141344 | 1 | 3  | 0 | 0    | 0 | 120 | 0.26063918 | 3 | 1  | 0 | 0 | 0 | 4  |
| 15 | 0.14608837 | 3 | 0  | 0 | 4  | 0 | 73 | -1.1141344 | 1 | 8  | 0 | 0    | 0 | 120 | 0.26063918 | 3 | 0  | 0 | 0 | 1 | 6  |
| 15 | 0.14608837 | 3 | 0  | 0 | 4  | 0 | 73 | -1.1141344 | 1 | 6  | 0 | 0    | 0 | 120 | 0.26063918 | 3 | 0  | 0 | 0 | 2 | 12 |
| 15 | 0.14608837 | 3 | 0  | 0 | 10 | 0 | 73 | -1.1141344 | 3 | 0  | 0 | 4    | 2 | 121 | -0.7947767 | 1 | 1  | 0 | 0 | 0 | 3  |
| 15 | 0.14608837 | 3 | 0  | 0 | 5  | 0 | 73 | -1.1141344 | 1 | 9  | 0 | 1    | 0 | 121 | -0.7947767 | 4 | 3  | 0 | 0 | 0 | 2  |
| 15 | 0.14608837 | 3 | 0  | 0 | 4  | 0 | 73 | -1.1141344 | 1 | 6  | 0 | 0    | 1 | 121 | -0.7947767 | 4 | 4  | 0 | 0 | 2 | 2  |
| 15 | 0.14608837 | 3 | 0  | 0 | 7  | 0 | 73 | -1.1141344 | 1 | 10 | 0 | 0    | 1 | 121 | -0.7947767 | 4 | 3  | 1 | 0 | 2 | 2  |
| 15 | 0.14608837 | 3 | 0  | 0 | 0  | 0 | 73 | -1.1141344 | 1 | 2  | 0 | 0    | 2 | 121 | -0.7947767 | 2 | 1  | 1 | 1 | 1 | 5  |
| 15 | 0.14608837 | 3 | 0  | 0 | 0  | 0 | 73 | -1.1141344 | 1 | 5  | 0 | 0    | 1 | 121 | -0.7947767 | 2 | 1  | 1 | 1 | 1 | 4  |
| 15 | 0.14608837 | 3 | 0  | 0 | 11 | 0 | 73 | -1.1141344 | 1 | 2  | 0 | 2    | 0 | 121 | -0.7947767 | 2 | 0  | 7 | 3 | 0 | 0  |
| 15 | 0.14608837 | 3 | 0  | 0 | 10 | 0 | 73 | -1.1141344 | 1 | 10 | 0 | 0    | 0 | 121 | -0.7947767 | 4 | 1  | 0 | 0 | 2 | 4  |
| 15 | 0.14608837 | 3 | 0  | 0 | 7  | 0 | 73 | -1.1141344 | 1 | 8  | 0 | 0    | 0 | 121 | -0.7947767 | 3 | 0  | 0 | 0 | 1 | 6  |
| 15 | 0.14608837 | 3 | 0  | 0 | 8  | 0 | 73 | -1.1141344 | 1 | 10 | 0 | 0    | 0 | 121 | -0.7947767 | 3 | 0  | 0 | 0 | 1 | 7  |
| 15 | 0.14608837 | 1 | 0  | 0 | 10 | 0 | 73 | -1.1141344 | 1 | 6  | 0 | 0    | 0 | 122 | -0.7947767 | 3 | 0  | 0 | 1 | 3 | 0  |
| 15 | 0.14608837 | 3 | 0  | 0 | 0  | 0 | 73 | -1.1141344 | 1 | 4  | 0 | 0    | 0 | 121 | -0.7947767 | 3 | 0  | 0 | 0 | 1 | 6  |
| 15 | 0.14608837 | 3 | 0  | 0 | 0  | 0 | 40 | -0.9621317 | 3 | 0  | 0 | 2    | 2 | 121 | -0.7947767 | 4 | 0  | 0 | 0 | 0 | 0  |
| 15 | 0.14608837 | 1 | 0  | 0 | 11 | 0 | 40 | -0.9621317 | 4 | 0  | 0 | 4    | 2 | 121 | -0.7947767 | 4 | 0  | 0 | 0 | 0 | 11 |
| 15 | 0.14608837 | 3 | 0  | 0 | 6  | 0 | 40 | -0.9621317 | 1 | 6  | 0 | 0    | 0 | 122 | -0.1521684 | 4 | 1  | 0 | 1 | 3 | 0  |
| 15 | 0.14608837 | 3 | 0  | 0 | 5  | 0 | 40 | -0.9621317 | 1 | 7  | 0 | 0    | 0 | 122 | -0.1521684 | 1 | 2  | 0 | 0 | 2 | 5  |
| 15 | 0.14608837 | 3 | 0  | 0 | 6  | 0 | 40 | -0.9621317 | 1 | 6  | 0 | 0    | 0 | 122 | -0.1521684 | 4 | 0  | 0 | 0 | 7 | 0  |
| 15 | 0.14608837 | 3 | 0  | 0 | 0  | 0 | 40 | -0.9621317 | 1 | 5  | 0 | 0    | 1 | 122 | -0.1521684 | 4 | 1  | 0 | 0 | 0 | 6  |
| 15 | 0.14608837 | 3 | 0  | 0 | 0  | 0 | 40 | -0.9621317 | 4 | 0  | 0 | 4    | 2 | 122 | -0.1521684 | 4 | 2  | 0 | 0 | 0 | 2  |
| 15 | 0.14608837 | 3 | 0  | 0 | 6  | 0 | 40 | -0.9621317 | 1 | 4  | 0 | 0    | 4 | 122 | -0.1521684 | 4 | 2  | 1 | 1 | 3 | 3  |
| 15 | 0.14608837 | 3 | 6  | 0 | 0  | 0 | 40 | -0.9621317 | 1 | 8  | 0 | 0    | 0 | 122 | -0.1521684 | 4 | 1  | 3 | 0 | 0 | 5  |
| 15 | 0.14608837 | 1 | 5  | 0 | 0  | 0 | 40 | -0.9621317 | 1 | 6  | 0 | 2    | 0 | 122 | -0.1521684 | 4 | 0  | 0 | 0 | 2 | 6  |
| 15 | 0.14608837 | 1 | 11 | 0 | 0  | 0 | 40 | -0.9621317 | 1 | 5  | 0 | 0    | 0 | 122 | -0.1521684 | 3 | 0  | 6 | 1 | 0 | 0  |
| 15 | 0.14608837 | 1 | 4  | 0 | 1  | 0 | 40 | -0.9621317 | 1 | 7  | 0 | 1    | 0 | 122 | -0.1521684 | 3 | 0  | 0 | 3 | 2 | 0  |
| 15 | 0.14608837 | 1 | 8  | 0 | 0  | 0 | 40 | -0.9621317 | 1 | 7  | 0 | 0    | 2 | 122 | -0.1521684 | 4 | 0  | 0 | 0 | 0 | 7  |
| 15 | 0.14608837 | 1 | 6  | 0 | 0  | 0 | 40 | -0.9621317 | 1 | 1  | 0 | 0    | 3 | 122 | -0.1521684 | 4 | 0  | 0 | 0 | 2 | 5  |
| 15 | 0.14608837 | 1 | 12 | 0 | 0  | 0 | 40 | -0.9621317 | 1 | 3  | 0 | 0    | 3 | 122 | -0.1521684 | 4 | 0  | 0 | 1 | 3 | 0  |
| 15 | 0.14608837 | 1 | 7  | 0 | 0  | 0 | 40 | -0.9621317 | 1 | 7  | 0 | 0    | 0 | 122 | -0.1521684 | 4 | 0  | 0 | 0 | 1 | 3  |
| 15 | 0.14608837 | 1 | 10 | 0 | 0  | 0 | 40 | -0.9621317 | 1 | 6  | 0 | 0    | 3 | 122 | -0.1521684 | 4 | 0  | 0 | 0 | 3 | 6  |
| 15 | 0.14608837 | 1 | 0  | 0 | 0  | 0 | 40 | -0.9621317 | 1 | 3  | 0 | 0    | 0 | 122 | -0.1521684 | 4 | 0  | 0 | 0 | 2 | 4  |
| 15 | 0.14608837 | 1 | 0  | 0 | 0  | 0 | 40 | -0.9621317 | 3 | 4  | 0 | 4    | 0 | 122 | -0.1521684 | 4 | 0  | 0 | 0 | 0 | 4  |
| 15 | 0.14608837 | 1 | 0  | 0 | 0  | 0 | 40 | -0.9621317 | 1 | 5  | 0 | 0    | 0 | 122 | -0.1521684 | 4 | 0  | 0 | 0 | 0 | 5  |
| 15 | 0.14608837 | 0 | 11 | 0 | 0  | 0 | 40 | -0.9621317 | 3 | 0  | 0 | 0    | 0 | 123 | 0.10404049 | 4 | 0  | 1 | 4 | 0 | 5  |
| 15 | 0.14608837 | 0 | 1  | 0 | 0  | 0 | 40 | -0.9621317 | 3 | 0  | 0 | 4    | 0 | 123 | 0.10404049 | 4 | 0  | 0 | 1 | 4 | 5  |
| 15 | 0.14608837 | 1 | 0  | 0 | 0  | 0 | 40 | -0.9621317 | 3 | 0  | 0 | 0    | 0 | 123 | 0.10404049 | 4 | 4  | 0 | 0 | 1 | 3  |
| 15 | 0.14608837 | 1 | 0  | 0 | 0  | 0 | 40 | -0.9621317 | 3 | 0  | 0 | 5    | 0 | 123 | 0.10404049 | 4 | 4  | 0 | 0 | 1 | 3  |
| 16 | 0.26298722 | 4 | 0  | 0 | 0  | 0 | 40 | -0.9621317 | 3 | 0  | 0 | 7    | 0 | 123 | 0.10404049 | 4 | 0  | 0 | 0 | 0 | 9  |
| 16 | 0.26298722 | 4 | 0  | 0 | 7  | 0 | 40 | -0.9621317 | 1 | 2  | 0 | 4    | 0 | 123 | 0.10404049 | 4 | 2  | 2 | 2 | 2 | 2  |
| 16 | 0.26298722 | 4 | 0  | 0 | 0  | 9 | 40 | -0.9621317 | 1 | 9  | 0 | 0    | 0 | 123 | 0.10404049 | 4 | 1  | 2 | 1 | 2 | 2  |
| 16 | 0.26298722 | 3 | 0  | 0 | 6  | 0 | 40 | -0.9621317 | 1 | 6  | 0 | 2    | 0 | 123 | 0.10404049 | 3 | 0  | 0 | 8 | 0 | 0  |
| 16 | 0.26298722 | 3 | 0  | 0 | 12 | 0 | 40 | -0.9621317 | 1 | 10 | 0 | 0    | 0 | 123 | 0.10404049 | 4 | 0  | 0 | 0 | 0 | 4  |
| 16 | 0.26298722 | 3 | 0  | 0 | 2  | 5 | 40 | -0.9621317 | 1 | 3  | 0 | 0    | 4 | 123 | 0.10404049 | 4 | 0  | 0 | 1 | 8 | 0  |
| 16 | 0.26298722 | 4 | 0  | 0 | 0  | 9 | 35 | 0.08994369 | 1 | 0  | 0 | 1    | 4 | 123 | 0.10404049 | 4 | 0  | 0 | 1 | 6 | 0  |
| 16 | 0.26298722 | 4 | 0  | 0 | 6  | 3 | 35 | 0.08994369 | 1 | 3  | 0 | 0    | 4 | 123 | 0.10404049 | 4 | 0  | 0 | 1 | 6 | 0  |
| 16 | 0.26298722 | 4 | 0  | 0 | 0  | 9 | 35 | 0.08994369 | 1 | 1  | 0 | 3    | 2 | 123 | 0.10404049 | 4 | 0  | 0 | 0 | 0 | 10 |
| 16 | 0.26298722 | 4 | 0  | 0 | 0  | 6 | 35 | 0.08994369 | 1 | 11 | 0 | 0    | 0 | 61  | -0.2053642 | 4 | 0  | 0 | 0 | 2 | 6  |
| 16 | 0.26298722 | 4 | 0  | 0 | 0  | 0 | 35 | 0.08994369 | 1 | 6  | 0 | 0    | 0 | 61  | -0.2053642 | 4 | 0  | 0 | 0 | 4 | 4  |
| 16 | 0.26298722 | 4 | 0  | 0 | 7  | 0 | 35 | 0.08994369 | 1 | 3  | 0 | 0    | 2 | 61  | -0.2053642 | 4 | 0  | 0 | 4 | 6 | 0  |
| 16 | 0.26298722 | 4 | 0  | 0 | 3  | 5 | 35 | 0.08994369 | 4 | 0  | 0 | 2    | 2 | 61  | -0.2053642 | 4 | 0  | 0 | 2 | 7 | 0  |
| 16 | 0.26298722 | 4 | 0  | 0 | 9  | 0 | 35 | 0.08994369 | 1 | 0  | 0 | 3    | 0 | 61  | -0.2053642 | 4 | 0  | 0 | 2 | 6 | 0  |
| 16 | 0.26298722 | 1 | 6  | 0 | 0  | 0 | 35 | 0.08994369 | 4 | 0  | 0 | 4    | 0 | 61  | -0.2053642 | 4 | 0  | 0 | 1 | 7 | 0  |
| 16 | 0.26298722 | 1 | 7  | 0 | 0  | 0 | 35 | 0.08994369 | 1 | 5  | 0 | 2    | 0 | 61  | -0.2053642 | 4 | 0  | 0 | 1 | 5 | 0  |
| 17 | -0.5629747 | 4 | 0  | 0 | 4  | 8 | 35 | 0.08994369 | 1 | 4  | 0 | 3    | 0 | 61  | -0.2053642 | 4 | 0  | 0 | 1 | 5 | 0  |
| 17 | -0.5629747 | 4 | 0  | 0 | 0  | 0 | 35 | 0.08994369 | 1 | 6  | 0 | 2    | 0 | 61  | -0.2053642 | 3 | 0  | 0 | 1 | 8 | 0  |
| 17 | -0.5629747 | 4 | 4  | 0 | 0  | 4 | 35 | 0.08994369 | 1 | 5  | 0 | 2    | 0 | 61  | -0.2053642 | 4 | 0  | 0 | 0 | 3 | 0  |
| 17 | -0.5629747 | 4 | 0  | 0 | 0  | 4 | 35 | 0.08994369 | 1 | 7  | 0 | 2    | 0 | 61  | -0.2053642 | 4 | 0  | 0 | 0 | 0 | 0  |
| 17 | -0.5629747 | 4 | 0  | 0 | 0  | 0 | 35 | 0.08994369 | 1 | 4  | 0 | 1    | 2 | 124 | -0.1525137 | 4 | 0  | 0 | 1 | 4 | 0  |
| 17 | -0.5629747 | 4 | 0  | 0 | 0  | 0 | 35 | 0.08994369 | 1 | 4  | 0 | 0    | 4 | 124 | -0.1525137 | 4 | 0  | 1 | 1 | 6 | 0  |
| 17 | -0.5629747 | 4 | 0  | 0 | 8  | 0 | 35 | 0.08994369 | 4 | 4  | 0 | 0    | 2 | 124 | -0.1525137 | 4 | 2  | 1 | 1 | 1 | 6  |
| 17 | -0.5629747 | 4 | 0  | 0 | 1  | 8 | 35 | 0.08994369 | 1 | 4  | 0 | 0    | 4 | 124 | -0.1525137 | 1 | 10 | 0 | 0 | 0 | 0  |
| 17 | -0.5629747 | 4 | 0  | 0 | 12 | 0 | 35 | 0.08994369 | 1 | 7  | 0 | 0    | 1 | 124 | -0.1525137 | 1 | 3  | 0 | 1 | 0 | 0  |
| 17 | -0.5629747 | 4 | 0  | 0 | 0  | 0 | 35 | 0.08994369 | 1 | 4  | 0 | 0    | 2 | 57  | 0.46721311 | 4 | 1  | 0 | 1 | 4 | 0  |
| 17 | -0.5629747 | 4 | 0  | 0 | 0  | 0 | 35 | 0.08994369 | 1 | 5  | 0 | 1    | 2 | 57  | 0.46721311 | 4 | 0  | 1 | 0 | 0 | 0  |
| 17 | -0.5629747 | 4 | 0  | 0 | 2  | 2 | 35 | 0.08994369 | 1 | 8  | 0 | 0    | 0 | 57  | 0.46721311 | 3 | 0  | 0 | 9 | 0 | 0  |
| 17 | -0.5629747 | 4 | 2  | 0 | 2  | 3 | 35 | 0.08994369 | 4 | 0  | 0 | 2    | 5 | 57  | 0.46721311 | 3 | 0  | 0 | 5 | 3 | 0  |
| 17 | -0.5629747 | 4 | 0  | 0 | 2  | 5 | 35 | 0.08994369 | 3 | 0  | 0 | 10</ |   |     |            |   |    |   |   |   |    |

|    |            |   |    |    |    |   |   |    |            |   |    |   |   |    |   |     |            |   |   |   |   |    |    |
|----|------------|---|----|----|----|---|---|----|------------|---|----|---|---|----|---|-----|------------|---|---|---|---|----|----|
| 18 | -0.4790002 | 1 | 5  | 0  | 0  | 0 | 0 | 31 | 0.27911465 | 3 | 12 | 0 | 0 | 0  | 0 | 128 | 0.60853009 | 1 | 2 | 0 | 0 | 2  | 3  |
| 18 | -0.4790002 | 1 | 0  | 0  | 2  | 5 | 0 | 31 | 0.27911465 | 3 | 0  | 0 | 0 | 4  | 4 | 128 | 0.60853009 | 4 | 0 | 0 | 0 | 0  | 1  |
| 18 | -0.4790002 | 1 | 2  | 0  | 0  | 0 | 0 | 31 | 0.27911465 | 3 | 0  | 0 | 0 | 9  | 0 | 128 | 0.60853009 | 4 | 0 | 0 | 0 | 0  | 4  |
| 18 | -0.4790002 | 1 | 4  | 0  | 0  | 0 | 0 | 31 | 0.27911465 | 3 | 0  | 0 | 0 | 7  | 0 | 128 | 0.60853009 | 4 | 0 | 0 | 0 | 0  | 13 |
| 18 | -0.4790002 | 1 | 9  | 0  | 1  | 0 | 0 | 31 | 0.27911465 | 4 | 0  | 0 | 0 | 0  | 0 | 129 | -0.7467868 | 4 | 0 | 0 | 0 | 1  | 5  |
| 18 | -0.4790002 | 1 | 0  | 0  | 0  | 0 | 0 | 36 | -0.6623215 | 1 | 0  | 0 | 0 | 9  | 0 | 129 | -0.7467868 | 4 | 0 | 0 | 0 | 1  | 3  |
| 19 | 0.1133087  | 1 | 2  | 0  | 5  | 0 | 0 | 36 | -0.6623215 | 1 | 8  | 0 | 0 | 0  | 0 | 129 | -0.7467868 | 3 | 0 | 0 | 0 | 4  | 2  |
| 19 | 0.1133087  | 1 | 0  | 0  | 0  | 0 | 0 | 36 | -0.6623215 | 1 | 1  | 0 | 0 | 0  | 4 | 129 | -0.7467868 | 4 | 0 | 0 | 0 | 2  | 8  |
| 19 | 0.1133087  | 4 | 7  | 0  | 0  | 0 | 0 | 36 | -0.6623215 | 1 | 8  | 0 | 0 | 0  | 0 | 129 | -0.7467868 | 1 | 1 | 0 | 0 | 3  | 6  |
| 19 | 0.1133087  | 1 | 10 | 0  | 0  | 0 | 0 | 36 | -0.6623215 | 1 | 3  | 0 | 0 | 3  | 0 | 129 | -0.7467868 | 3 | 0 | 0 | 0 | 2  | 3  |
| 19 | 0.1133087  | 4 | 0  | 0  | 7  | 0 | 0 | 36 | -0.6623215 | 1 | 1  | 0 | 0 | 1  | 0 | 129 | -0.7467868 | 4 | 0 | 0 | 0 | 0  | 7  |
| 19 | 0.1133087  | 3 | 0  | 0  | 6  | 0 | 0 | 36 | -0.6623215 | 1 | 3  | 0 | 0 | 2  | 0 | 130 | 0.38891174 | 4 | 0 | 0 | 0 | 1  | 6  |
| 19 | 0.1133087  | 3 | 0  | 0  | 11 | 0 | 0 | 36 | -0.6623215 | 1 | 6  | 0 | 0 | 0  | 0 | 130 | 0.38891174 | 3 | 0 | 0 | 0 | 8  | 1  |
| 19 | 0.1133087  | 3 | 0  | 0  | 4  | 0 | 0 | 29 | -0.4265799 | 3 | 0  | 0 | 4 | 3  | 0 | 130 | 0.38891174 | 1 | 4 | 0 | 0 | 0  | 0  |
| 19 | 0.1133087  | 3 | 0  | 0  | 6  | 0 | 0 | 29 | -0.4265799 | 3 | 3  | 0 | 0 | 1  | 4 | 130 | 0.38891174 | 3 | 1 | 0 | 2 | 3  | 0  |
| 19 | 0.1133087  | 1 | 4  | 0  | 2  | 0 | 0 | 29 | -0.4265799 | 1 | 10 | 0 | 0 | 0  | 0 | 13  | -0.6454721 | 3 | 0 | 0 | 0 | 1  | 3  |
| 19 | 0.1133087  | 3 | 3  | 0  | 3  | 0 | 0 | 29 | -0.4265799 | 1 | 4  | 0 | 0 | 3  | 0 | 13  | -0.6454721 | 3 | 0 | 0 | 0 | 9  | 1  |
| 19 | 0.1133087  | 3 | 0  | 0  | 8  | 0 | 0 | 29 | -0.4265799 | 3 | 0  | 0 | 0 | 9  | 0 | 13  | -0.6454721 | 3 | 0 | 0 | 0 | 11 | 0  |
| 19 | 0.1133087  | 3 | 0  | 0  | 6  | 0 | 0 | 29 | -0.4265799 | 4 | 0  | 0 | 0 | 8  | 0 | 13  | -0.6454721 | 3 | 0 | 0 | 0 | 7  | 1  |
| 19 | 0.1133087  | 3 | 0  | 0  | 3  | 0 | 0 | 29 | -0.4265799 | 3 | 2  | 0 | 0 | 5  | 0 | 13  | -0.6454721 | 1 | 6 | 0 | 0 | 1  | 0  |
| 19 | 0.1133087  | 3 | 4  | 0  | 4  | 0 | 0 | 29 | -0.4265799 | 4 | 8  | 0 | 0 | 0  | 1 | 13  | -0.6454721 | 3 | 0 | 0 | 0 | 2  | 9  |
| 19 | 0.1133087  | 3 | 3  | 0  | 8  | 0 | 0 | 29 | -0.4265799 | 1 | 6  | 0 | 0 | 2  | 0 | 13  | -0.6454721 | 4 | 1 | 0 | 1 | 0  | 1  |
| 19 | 0.1133087  | 3 | 0  | 0  | 4  | 0 | 0 | 29 | -0.4265799 | 4 | 3  | 0 | 0 | 0  | 1 | 13  | -0.6454721 | 4 | 0 | 0 | 0 | 1  | 3  |
| 19 | 0.1133087  | 3 | 8  | 0  | 0  | 0 | 0 | 29 | -0.4265799 | 4 | 0  | 0 | 0 | 0  | 9 | 65  | -0.5017981 | 1 | 7 | 0 | 0 | 0  | 0  |
| 19 | 0.1133087  | 3 | 1  | 0  | 6  | 0 | 0 | 29 | -0.4265799 | 4 | 5  | 0 | 0 | 0  | 2 | 65  | -0.5017981 | 4 | 0 | 0 | 0 | 2  | 2  |
| 19 | 0.1133087  | 1 | 0  | 0  | 0  | 0 | 0 | 29 | -0.4265799 | 1 | 5  | 0 | 0 | 0  | 0 | 63  | -0.4580645 | 3 | 3 | 0 | 0 | 3  | 0  |
| 6  | 0.0457931  | 1 | 2  | 0  | 2  | 3 | 0 | 29 | -0.4265799 | 4 | 3  | 0 | 0 | 4  | 3 | 63  | -0.4580645 | 3 | 0 | 0 | 0 | 2  | 5  |
| 6  | 0.0457931  | 1 | 2  | 0  | 2  | 0 | 0 | 29 | -0.4265799 | 3 | 0  | 0 | 0 | 8  | 0 | 63  | -0.4580645 | 4 | 0 | 0 | 0 | 2  | 5  |
| 20 | 0.26275188 | 3 | 0  | 0  | 0  | 0 | 0 | 29 | -0.4265799 | 3 | 0  | 0 | 4 | 0  | 0 | 63  | -0.4580645 | 4 | 1 | 0 | 0 | 3  | 6  |
| 21 | -0.5652193 | 1 | 0  | 0  | 11 | 0 | 0 | 29 | -0.4265799 | 1 | 3  | 0 | 0 | 0  | 0 | 63  | -0.4580645 | 3 | 0 | 0 | 0 | 0  | 7  |
| 21 | -0.5652193 | 2 | 0  | 10 | 0  | 0 | 0 | 46 | -0.5263299 | 1 | 0  | 0 | 3 | 2  | 0 | 63  | -0.4580645 | 4 | 0 | 0 | 0 | 0  | 3  |
| 21 | -0.5652193 | 1 | 0  | 0  | 0  | 0 | 0 | 46 | -0.5263299 | 1 | 7  | 0 | 0 | 0  | 0 | 63  | -0.4580645 | 4 | 0 | 0 | 0 | 0  | 6  |
| 21 | -0.5652193 | 1 | 0  | 0  | 3  | 2 | 2 | 46 | -0.5263299 | 1 | 9  | 0 | 0 | 1  | 0 | 63  | -0.4580645 | 3 | 0 | 0 | 0 | 2  | 7  |
| 21 | -0.5652193 | 3 | 0  | 8  | 0  | 0 | 0 | 46 | -0.5263299 | 1 | 2  | 0 | 0 | 5  | 0 | 131 | 0.04935728 | 4 | 0 | 0 | 0 | 3  | 4  |
| 21 | -0.5652193 | 2 | 0  | 4  | 0  | 4 | 0 | 46 | -0.5263299 | 1 | 7  | 0 | 0 | 0  | 0 | 131 | 0.04935728 | 4 | 1 | 0 | 0 | 1  | 4  |
| 21 | -0.5652193 | 1 | 0  | 6  | 0  | 0 | 0 | 46 | -0.5263299 | 1 | 2  | 0 | 4 | 0  | 0 | 131 | 0.04935728 | 4 | 1 | 0 | 2 | 5  | 0  |
| 21 | -0.5652193 | 1 | 0  | 3  | 2  | 1 | 0 | 46 | -0.5263299 | 1 | 7  | 0 | 0 | 1  | 0 | 131 | 0.04935728 | 4 | 0 | 0 | 0 | 0  | 4  |
| 21 | -0.5652193 | 2 | 0  | 6  | 2  | 3 | 0 | 46 | -0.5263299 | 3 | 1  | 0 | 0 | 3  | 0 | 131 | 0.04935728 | 4 | 0 | 0 | 0 | 0  | 5  |
| 21 | -0.5652193 | 2 | 0  | 4  | 0  | 0 | 0 | 46 | -0.5263299 | 4 | 0  | 0 | 1 | 4  | 0 | 17  | -0.5629747 | 4 | 0 | 0 | 0 | 1  | 5  |
| 21 | -0.5652193 | 1 | 2  | 4  | 0  | 0 | 0 | 46 | -0.5263299 | 4 | 3  | 0 | 0 | 0  | 4 | 17  | -0.5629747 | 4 | 0 | 0 | 0 | 2  | 7  |
| 21 | -0.5652193 | 1 | 7  | 0  | 0  | 3 | 0 | 46 | -0.5263299 | 1 | 3  | 0 | 0 | 3  | 0 | 17  | -0.5629747 | 4 | 0 | 0 | 0 | 2  | 5  |
| 21 | -0.5652193 | 1 | 1  | 6  | 0  | 1 | 0 | 46 | -0.5263299 | 4 | 10 | 0 | 0 | 1  | 0 | 17  | -0.5629747 | 4 | 1 | 0 | 0 | 2  | 5  |
| 21 | -0.5652193 | 1 | 0  | 2  | 0  | 4 | 0 | 46 | -0.5263299 | 1 | 7  | 0 | 0 | 0  | 0 | 17  | -0.5629747 | 1 | 1 | 0 | 0 | 2  | 3  |
| 22 | 0.01992373 | 4 | 0  | 0  | 0  | 0 | 0 | 46 | -0.5263299 | 4 | 0  | 0 | 0 | 4  | 0 | 132 | 0.16354351 | 4 | 0 | 0 | 0 | 1  | 6  |
| 22 | 0.01992373 | 4 | 0  | 0  | 0  | 0 | 0 | 46 | -0.5263299 | 1 | 5  | 0 | 0 | 2  | 0 | 132 | 0.16354351 | 4 | 2 | 0 | 0 | 2  | 1  |
| 22 | 0.01992373 | 4 | 3  | 4  | 0  | 0 | 0 | 46 | -0.5263299 | 1 | 9  | 0 | 1 | 1  | 0 | 132 | 0.16354351 | 4 | 0 | 0 | 0 | 0  | 0  |
| 22 | 0.01992373 | 4 | 4  | 0  | 0  | 0 | 0 | 46 | -0.5263299 | 1 | 6  | 0 | 0 | 0  | 0 | 59  | -0.6506817 | 4 | 0 | 0 | 0 | 0  | 9  |
| 22 | 0.01992373 | 4 | 2  | 0  | 4  | 0 | 0 | 46 | -0.5263299 | 1 | 5  | 0 | 0 | 0  | 0 | 59  | -0.6506817 | 4 | 0 | 0 | 0 | 0  | 5  |
| 22 | 0.01992373 | 4 | 0  | 0  | 0  | 0 | 0 | 46 | -0.5263299 | 4 | 0  | 0 | 4 | 3  | 0 | 60  | 0.26196807 | 4 | 0 | 0 | 0 | 0  | 0  |
| 22 | 0.01992373 | 1 | 0  | 4  | 0  | 0 | 0 | 46 | -0.5263299 | 3 | 0  | 0 | 6 | 0  | 0 | 60  | 0.26196807 | 4 | 0 | 0 | 0 | 0  | 0  |
| 22 | 0.01992373 | 4 | 0  | 11 | 0  | 0 | 0 | 46 | -0.5263299 | 4 | 6  | 0 | 0 | 2  | 0 | 13  | -0.6454721 | 4 | 0 | 0 | 0 | 0  | 0  |
| 22 | 0.01992373 | 4 | 0  | 0  | 0  | 0 | 0 | 46 | -0.5263299 | 4 | 4  | 0 | 0 | 4  | 0 | 13  | -0.6454721 | 4 | 0 | 0 | 0 | 0  | 0  |
| 22 | 0.01992373 | 1 | 10 | 0  | 0  | 0 | 0 | 46 | -0.5263299 | 4 | 0  | 0 | 0 | 0  | 4 | 13  | -0.6454721 | 3 | 0 | 6 | 0 | 0  | 0  |
| 22 | 0.01992373 | 4 | 0  | 0  | 0  | 7 | 0 | 46 | -0.5263299 | 1 | 7  | 0 | 0 | 0  | 0 | 13  | -0.6454721 | 3 | 0 | 0 | 0 | 5  | 0  |
| 22 | 0.01992373 | 4 | 0  | 2  | 4  | 0 | 0 | 46 | -0.5263299 | 1 | 6  | 0 | 0 | 0  | 4 | 13  | -0.6454721 | 4 | 0 | 0 | 0 | 7  | 0  |
| 22 | 0.01992373 | 2 | 0  | 8  | 2  | 0 | 0 | 46 | -0.5263299 | 4 | 0  | 0 | 0 | 9  | 0 | 13  | -0.6454721 | 3 | 0 | 0 | 0 | 9  | 0  |
| 22 | 0.01992373 | 4 | 0  | 0  | 5  | 0 | 0 | 74 | -0.0456928 | 4 | 2  | 0 | 2 | 1  | 0 | 13  | -0.6454721 | 3 | 0 | 0 | 0 | 9  | 0  |
| 22 | 0.01992373 | 4 | 4  | 1  | 0  | 3 | 0 | 74 | -0.0456928 | 1 | 6  | 0 | 0 | 0  | 0 | 13  | -0.6454721 | 3 | 0 | 2 | 5 | 0  | 0  |
| 22 | 0.01992373 | 4 | 0  | 0  | 3  | 2 | 0 | 74 | -0.0456928 | 1 | 11 | 0 | 0 | 0  | 0 | 13  | -0.6454721 | 3 | 0 | 2 | 5 | 0  | 0  |
| 22 | 0.01992373 | 4 | 0  | 0  | 4  | 7 | 0 | 74 | -0.0456928 | 1 | 2  | 0 | 0 | 0  | 0 | 13  | -0.6454721 | 4 | 3 | 2 | 0 | 0  | 0  |
| 22 | 0.01992373 | 4 | 0  | 2  | 3  | 3 | 0 | 74 | -0.0456928 | 4 | 5  | 0 | 3 | 0  | 0 | 13  | -0.6454721 | 4 | 0 | 0 | 0 | 8  | 0  |
| 22 | 0.01992373 | 4 | 0  | 0  | 3  | 5 | 0 | 74 | -0.0456928 | 4 | 0  | 0 | 0 | 5  | 0 | 13  | -0.6454721 | 3 | 0 | 2 | 1 | 0  | 0  |
| 22 | 0.01992373 | 4 | 0  | 0  | 4  | 4 | 0 | 74 | -0.0456928 | 4 | 1  | 0 | 2 | 3  | 0 | 13  | -0.6454721 | 3 | 2 | 2 | 4 | 0  | 0  |
| 22 | 0.01992373 | 4 | 0  | 0  | 2  | 1 | 0 | 74 | -0.0456928 | 4 | 4  | 0 | 0 | 1  | 0 | 13  | -0.6454721 | 3 | 0 | 1 | 4 | 0  | 0  |
| 22 | 0.01992373 | 4 | 0  | 0  | 4  | 0 | 0 | 74 | -0.0456928 | 1 | 4  | 0 | 1 | 0  | 0 | 13  | -0.6454721 | 3 | 0 | 0 | 6 | 0  | 0  |
| 22 | 0.01992373 | 4 | 0  | 5  | 1  | 1 | 0 | 74 | -0.0456928 | 3 | 0  | 0 | 4 | 3  | 0 | 13  | -0.6454721 | 3 | 0 | 3 | 0 | 0  | 0  |
| 22 | 0.01992373 | 4 | 0  | 8  | 0  | 2 | 0 | 74 | -0.0456928 | 4 | 0  | 0 | 0 | 10 | 0 | 13  | -0.6454721 | 3 | 0 | 0 | 8 | 0  | 0  |
| 22 | 0.01992373 | 4 | 0  | 4  | 0  | 0 | 0 | 74 | -0.0456928 | 4 | 0  | 0 | 0 | 0  | 0 | 13  | -0.6454721 | 4 | 0 | 0 | 4 | 2  | 0  |
| 22 | 0.01992373 | 4 | 0  | 7  | 0  | 0 | 0 | 74 | -0.0456928 | 4 | 2  | 0 | 0 | 4  | 0 | 13  | -0.6454721 | 3 | 0 | 9 | 0 | 0  | 0  |
| 22 | 0.01992373 | 4 | 0  | 0  | 0  | 0 | 0 | 74 | -0.0456928 | 4 | 3  | 0 | 0 | 5  | 0 |     |            |   |   |   |   |    |    |

|    |            |   |   |    |    |   |    |    |            |   |   |   |   |    |   |     |            |            |   |    |    |    |   |   |
|----|------------|---|---|----|----|---|----|----|------------|---|---|---|---|----|---|-----|------------|------------|---|----|----|----|---|---|
| 24 | 0.13049266 | 3 | 0 | 0  | 0  | 0 | 3  | 44 | -0.8338155 | 3 | 0 | 0 | 0 | 13 | 0 | 109 | 0.13340497 | 2          | 0 | 0  | 0  | 6  | 0 |   |
| 24 | 0.13049266 | 2 | 2 | 6  | 0  | 0 | 0  | 44 | -0.8338155 | 3 | 0 | 0 | 6 | 0  | 0 | 109 | 0.13340497 | 3          | 0 | 3  | 9  | 0  | 0 |   |
| 24 | 0.13049266 | 3 | 0 | 6  | 0  | 0 | 2  | 44 | -0.8338155 | 3 | 0 | 0 | 0 | 4  | 0 | 109 | 0.13340497 | 4          | 0 | 0  | 0  | 5  | 0 |   |
| 24 | 0.13049266 | 3 | 0 | 4  | 0  | 0 | 1  | 44 | -0.8338155 | 3 | 0 | 0 | 0 | 0  | 0 | 109 | 0.13340497 | 2          | 3 | 0  | 0  | 0  | 0 |   |
| 24 | 0.13049266 | 3 | 0 | 0  | 1  | 3 | 3  | 44 | -0.8338155 | 1 | 5 | 0 | 1 | 0  | 0 | 109 | 0.13340497 | 4          | 0 | 0  | 0  | 0  | 0 |   |
| 24 | 0.13049266 | 3 | 0 | 0  | 0  | 0 | 0  | 44 | -0.8338155 | 1 | 5 | 0 | 0 | 0  | 0 | 109 | 0.13340497 | 2          | 0 | 2  | 5  | 0  | 0 |   |
| 24 | 0.13049266 | 3 | 0 | 0  | 12 | 0 | 0  | 44 | -0.8338155 | 1 | 3 | 0 | 0 | 0  | 0 | 109 | 0.13340497 | 3          | 0 | 2  | 2  | 0  | 0 |   |
| 24 | 0.13049266 | 3 | 0 | 6  | 0  | 1 | 1  | 44 | -0.8338155 | 1 | 7 | 0 | 0 | 0  | 0 | 109 | 0.13340497 | 2          | 0 | 3  | 2  | 0  | 0 |   |
| 24 | 0.13049266 | 2 | 0 | 3  | 0  | 0 | 10 | 44 | -0.8338155 | 4 | 6 | 6 | 0 | 0  | 0 | 109 | 0.13340497 | 2          | 1 | 1  | 1  | 4  | 0 |   |
| 24 | 0.13049266 | 2 | 1 | 2  | 1  | 1 | 2  | 28 | -0.164918  | 1 | 4 | 0 | 0 | 0  | 0 | 109 | 0.13340497 | 1          | 1 | 3  | 1  | 1  | 1 |   |
| 24 | 0.13049266 | 2 | 0 | 2  | 1  | 5 | 5  | 28 | -0.164918  | 1 | 9 | 0 | 0 | 0  | 0 | 109 | 0.13340497 | 2          | 3 | 1  | 0  | 2  | 1 |   |
| 24 | 0.13049266 | 2 | 0 | 2  | 1  | 4 | 4  | 28 | -0.164918  | 3 | 2 | 0 | 0 | 2  | 0 | 109 | 0.13340497 | 1          | 0 | 0  | 4  | 1  | 0 |   |
| 24 | 0.13049266 | 2 | 0 | 3  | 0  | 6 | 6  | 28 | -0.164918  | 3 | 0 | 0 | 6 | 4  | 0 | 109 | 0.13340497 | 2          | 0 | 0  | 0  | 12 | 0 |   |
| 24 | 0.13049266 | 2 | 2 | 0  | 0  | 3 | 3  | 28 | -0.164918  | 3 | 6 | 0 | 0 | 2  | 0 | 109 | 0.13340497 | 2          | 0 | 8  | 0  | 0  | 0 |   |
| 24 | 0.13049266 | 1 | 2 | 4  | 0  | 1 | 1  | 28 | -0.164918  | 1 | 4 | 0 | 0 | 0  | 0 | 109 | 0.13340497 | 2          | 0 | 3  | 6  | 0  | 0 |   |
| 24 | 0.13049266 | 1 | 2 | 1  | 0  | 2 | 2  | 28 | -0.164918  | 1 | 3 | 0 | 2 | 0  | 0 | 109 | 0.13340497 | 3          | 0 | 5  | 2  | 0  | 0 |   |
| 24 | 0.13049266 | 1 | 1 | 0  | 0  | 5 | 5  | 28 | -0.164918  | 1 | 3 | 0 | 3 | 1  | 0 | 109 | 0.13340497 | 2          | 0 | 2  | 3  | 0  | 0 |   |
| 24 | 0.13049266 | 1 | 0 | 4  | 0  | 2 | 2  | 28 | -0.164918  | 1 | 7 | 0 | 1 | 1  | 0 | 109 | 0.13340497 | 1          | 1 | 1  | 2  | 0  | 0 |   |
| 24 | 0.13049266 | 4 | 4 | 0  | 0  | 4 | 4  | 28 | -0.164918  | 4 | 0 | 0 | 0 | 7  | 0 | 109 | 0.13340497 | 3          | 0 | 0  | 7  | 0  | 0 |   |
| 24 | 0.13049266 | 4 | 0 | 1  | 0  | 5 | 5  | 28 | -0.164918  | 4 | 0 | 0 | 1 | 7  | 0 | 109 | 0.13340497 | 2          | 0 | 0  | 8  | 0  | 0 |   |
| 25 | 0.05050057 | 4 | 0 | 5  | 0  | 4 | 4  | 28 | -0.164918  | 4 | 1 | 0 | 1 | 5  | 0 | 109 | 0.13340497 | 3          | 0 | 0  | 6  | 0  | 0 |   |
| 25 | 0.05050057 | 1 | 4 | 0  | 0  | 0 | 0  | 28 | -0.164918  | 4 | 0 | 0 | 0 | 7  | 0 | 109 | 0.13340497 | 2          | 0 | 1  | 6  | 0  | 0 |   |
| 25 | 0.05050057 | 4 | 0 | 3  | 0  | 6 | 6  | 28 | -0.164918  | 4 | 4 | 0 | 0 | 5  | 0 | 109 | 0.13340497 | 3          | 0 | 0  | 6  | 4  | 0 |   |
| 25 | 0.05050057 | 4 | 8 | 0  | 0  | 0 | 0  | 28 | -0.164918  | 4 | 0 | 0 | 0 | 0  | 0 | 109 | 0.13340497 | 2          | 0 | 6  | 0  | 1  | 0 |   |
| 25 | 0.05050057 | 4 | 0 | 5  | 1  | 1 | 1  | 28 | -0.164918  | 1 | 4 | 0 | 0 | 2  | 0 | 109 | 0.13340497 | 2          | 1 | 2  | 3  | 0  | 0 |   |
| 25 | 0.05050057 | 4 | 0 | 1  | 4  | 2 | 2  | 28 | -0.164918  | 4 | 3 | 0 | 4 | 0  | 0 | 109 | 0.13340497 | 2          | 0 | 3  | 0  | 0  | 0 |   |
| 25 | 0.05050057 | 4 | 0 | 8  | 0  | 0 | 0  | 28 | -0.164918  | 4 | 2 | 0 | 0 | 2  | 0 | 109 | 0.13340497 | 2          | 0 | 6  | 0  | 0  | 0 |   |
| 25 | 0.05050057 | 4 | 0 | 0  | 5  | 0 | 0  | 28 | -0.164918  | 4 | 0 | 0 | 0 | 7  | 0 | 109 | 0.13340497 | 2          | 0 | 0  | 5  | 0  | 0 |   |
| 25 | 0.05050057 | 1 | 5 | 0  | 0  | 3 | 3  | 28 | -0.164918  | 1 | 2 | 0 | 0 | 4  | 0 | 109 | 0.13340497 | 2          | 0 | 9  | 0  | 0  | 0 |   |
| 25 | 0.05050057 | 4 | 0 | 4  | 4  | 0 | 0  | 28 | -0.164918  | 1 | 2 | 0 | 0 | 2  | 0 | 109 | 0.13340497 | 2          | 2 | 6  | 0  | 0  | 0 |   |
| 25 | 0.05050057 | 4 | 0 | 4  | 0  | 0 | 0  | 28 | -0.164918  | 1 | 1 | 0 | 0 | 2  | 2 | 0   | 109        | 0.13340497 | 3 | 2  | 2  | 4  | 0 | 0 |
| 25 | 0.05050057 | 4 | 0 | 3  | 0  | 4 | 4  | 28 | -0.164918  | 1 | 8 | 0 | 0 | 1  | 0 | 109 | 0.13340497 | 2          | 0 | 0  | 0  | 0  | 0 |   |
| 25 | 0.05050057 | 4 | 0 | 6  | 0  | 4 | 4  | 28 | -0.164918  | 1 | 2 | 0 | 0 | 3  | 0 | 109 | 0.13340497 | 1          | 3 | 1  | 1  | 0  | 0 |   |
| 25 | 0.05050057 | 4 | 3 | 1  | 0  | 2 | 2  | 28 | -0.164918  | 1 | 5 | 0 | 0 | 2  | 0 | 109 | 0.13340497 | 2          | 0 | 3  | 3  | 0  | 0 |   |
| 25 | 0.05050057 | 4 | 0 | 2  | 0  | 7 | 7  | 28 | -0.164918  | 1 | 0 | 0 | 5 | 0  | 0 | 109 | 0.13340497 | 4          | 0 | 12 | 0  | 0  | 0 |   |
| 25 | 0.05050057 | 4 | 0 | 2  | 1  | 4 | 4  | 28 | -0.164918  | 1 | 1 | 0 | 5 | 2  | 0 | 109 | 0.13340497 | 4          | 0 | 0  | 0  | 9  | 0 |   |
| 25 | 0.05050057 | 4 | 0 | 2  | 0  | 2 | 2  | 28 | -0.164918  | 3 | 4 | 0 | 0 | 4  | 0 | 109 | 0.13340497 | 2          | 0 | 2  | 7  | 0  | 0 |   |
| 25 | 0.05050057 | 4 | 0 | 3  | 0  | 4 | 4  | 28 | -0.164918  | 3 | 7 | 0 | 0 | 1  | 0 | 109 | 0.13340497 | 3          | 1 | 7  | 0  | 0  | 0 |   |
| 25 | 0.05050057 | 4 | 0 | 3  | 0  | 3 | 3  | 28 | -0.164918  | 3 | 3 | 0 | 1 | 0  | 0 | 109 | 0.13340497 | 3          | 3 | 0  | 5  | 0  | 0 |   |
| 25 | 0.05050057 | 4 | 0 | 3  | 0  | 6 | 6  | 28 | -0.164918  | 3 | 0 | 0 | 9 | 0  | 0 | 109 | 0.13340497 | 3          | 3 | 0  | 0  | 3  | 0 |   |
| 25 | 0.05050057 | 1 | 3 | 11 | 0  | 0 | 0  | 28 | -0.164918  | 3 | 0 | 0 | 6 | 0  | 0 | 109 | 0.13340497 | 1          | 5 | 0  | 1  | 2  | 0 |   |
| 25 | 0.05050057 | 4 | 0 | 0  | 0  | 7 | 7  | 28 | -0.164918  | 3 | 0 | 0 | 5 | 0  | 0 | 109 | 0.13340497 | 4          | 0 | 0  | 2  | 0  | 0 |   |
| 25 | 0.05050057 | 1 | 2 | 0  | 0  | 4 | 4  | 28 | -0.164918  | 3 | 0 | 0 | 7 | 0  | 0 | 109 | 0.13340497 | 1          | 2 | 0  | 0  | 0  | 0 |   |
| 26 | -0.4862185 | 2 | 0 | 4  | 0  | 2 | 2  | 28 | -0.164918  | 0 | 6 | 0 | 0 | 6  | 0 | 109 | 0.13340497 | 1          | 3 | 0  | 0  | 0  | 0 |   |
| 26 | -0.4862185 | 2 | 0 | 0  | 11 | 0 | 0  | 28 | -0.164918  | 1 | 8 | 0 | 0 | 0  | 0 | 109 | 0.13340497 | 1          | 7 | 0  | 0  | 0  | 0 |   |
| 26 | -0.4862185 | 2 | 0 | 4  | 0  | 0 | 0  | 28 | -0.164918  | 1 | 5 | 0 | 0 | 0  | 0 | 109 | 0.13340497 | 4          | 0 | 0  | 0  | 8  | 0 |   |
| 26 | -0.4862185 | 3 | 0 | 4  | 1  | 2 | 2  | 28 | -0.164918  | 1 | 3 | 0 | 0 | 1  | 0 | 109 | 0.13340497 | 4          | 0 | 0  | 0  | 7  | 0 |   |
| 26 | -0.4862185 | 2 | 0 | 6  | 0  | 0 | 0  | 28 | -0.164918  | 1 | 7 | 0 | 0 | 0  | 0 | 109 | 0.13340497 | 4          | 0 | 0  | 0  | 0  | 0 |   |
| 26 | -0.4862185 | 2 | 0 | 4  | 0  | 6 | 6  | 23 | -0.918747  | 1 | 7 | 0 | 0 | 0  | 0 | 109 | 0.13340497 | 4          | 0 | 0  | 0  | 7  | 0 |   |
| 26 | -0.4862185 | 2 | 0 | 0  | 0  | 0 | 0  | 23 | -0.918747  | 4 | 0 | 0 | 0 | 5  | 0 | 12  | 0.03251334 | 1          | 0 | 0  | 2  | 3  | 0 |   |
| 26 | -0.4862185 | 2 | 3 | 0  | 0  | 5 | 5  | 23 | -0.918747  | 4 | 0 | 0 | 0 | 0  | 5 | 12  | 0.03251334 | 4          | 0 | 0  | 0  | 9  | 0 |   |
| 26 | -0.4862185 | 2 | 1 | 0  | 2  | 2 | 2  | 23 | -0.918747  | 4 | 3 | 0 | 0 | 6  | 0 | 12  | 0.03251334 | 3          | 0 | 0  | 11 | 0  | 0 |   |
| 26 | -0.4862185 | 4 | 0 | 0  | 0  | 5 | 5  | 23 | -0.918747  | 4 | 0 | 0 | 3 | 7  | 0 | 12  | 0.03251334 | 4          | 0 | 0  | 5  | 0  | 0 |   |
| 26 | -0.4862185 | 4 | 0 | 0  | 0  | 6 | 6  | 23 | -0.918747  | 3 | 0 | 0 | 7 | 0  | 0 | 12  | 0.03251334 | 3          | 0 | 2  | 3  | 0  | 0 |   |
| 26 | -0.4862185 | 4 | 0 | 0  | 0  | 6 | 6  | 23 | -0.918747  | 3 | 0 | 0 | 0 | 1  | 0 | 12  | 0.03251334 | 3          | 0 | 0  | 0  | 0  | 0 |   |
| 27 | 0.14236623 | 2 | 0 | 1  | 0  | 3 | 3  | 24 | 0.13049266 | 4 | 0 | 0 | 0 | 1  | 0 | 12  | 0.03251334 | 3          | 3 | 1  | 2  | 1  | 0 |   |
| 27 | 0.14236623 | 3 | 4 | 0  | 3  | 2 | 2  | 24 | 0.13049266 | 4 | 0 | 0 | 2 | 5  | 0 | 12  | 0.03251334 | 3          | 0 | 0  | 0  | 8  | 0 |   |
| 27 | 0.14236623 | 2 | 0 | 4  | 2  | 0 | 0  | 24 | 0.13049266 | 1 | 3 | 0 | 0 | 2  | 0 | 12  | 0.03251334 | 3          | 0 | 14 | 0  | 0  | 0 |   |
| 27 | 0.14236623 | 2 | 0 | 2  | 1  | 0 | 0  | 24 | 0.13049266 | 4 | 4 | 0 | 0 | 2  | 2 | 0   | 12         | 0.03251334 | 2 | 0  | 6  | 2  | 0 | 0 |
| 27 | 0.14236623 | 2 | 0 | 2  | 2  | 2 | 2  | 24 | 0.13049266 | 1 | 6 | 0 | 0 | 0  | 0 | 12  | 0.03251334 | 2          | 0 | 1  | 11 | 0  | 0 |   |
| 27 | 0.14236623 | 3 | 0 | 2  | 5  | 4 | 4  | 24 | 0.13049266 | 0 | 1 | 6 | 0 | 5  | 0 | 12  | 0.03251334 | 3          | 0 | 0  | 0  | 0  | 0 |   |
| 27 | 0.14236623 | 3 | 0 | 0  | 0  | 5 | 5  | 24 | 0.13049266 | 1 | 4 | 0 | 1 | 1  | 0 | 12  | 0.03251334 | 3          | 0 | 3  | 4  | 0  | 0 |   |
| 27 | 0.14236623 | 3 | 0 | 2  | 0  | 8 | 8  | 24 | 0.13049266 | 4 | 7 | 0 | 1 | 1  | 0 | 12  | 0.03251334 | 3          | 0 | 0  | 2  | 2  | 0 |   |
| 27 | 0.14236623 | 3 | 0 | 4  | 2  | 3 | 3  | 24 | 0.13049266 | 4 | 0 | 0 | 0 | 7  | 0 | 12  | 0.03251334 | 2          | 0 | 4  | 0  | 0  | 0 |   |
| 27 | 0.14236623 | 3 | 0 | 0  | 4  | 4 | 4  | 24 | 0.13049266 | 4 | 2 | 0 | 0 | 6  | 0 | 12  | 0.03251334 | 2          | 0 | 5  | 0  | 0  | 0 |   |
| 27 | 0.14236623 | 3 | 0 | 0  | 5  | 0 | 5  | 24 | 0.13049266 | 4 | 0 | 0 | 4 | 0  | 0 | 12  | 0.03251334 | 2          | 0 | 8  | 0  | 0  | 0 |   |
| 27 | 0.14236623 | 3 | 0 | 4  | 0  | 0 | 0  | 24 | 0.13049266 | 1 | 3 | 0 | 0 | 2  | 0 | 12  | 0.03251334 | 2          | 0 | 6  | 1  | 0  | 0 |   |
| 27 | 0.14236623 | 3 | 0 | 3  | 0  | 3 | 3  | 24 | 0.13049266 | 1 | 6 | 0 | 0 | 0  | 0 | 12  | 0.03251334 | 3          | 0 | 7  | 1  | 0  | 0 |   |
| 27 | 0.14236623 | 2 | 0 | 0  | 2  | 2 | 2  | 24 | 0.13049266 | 1 | 2 | 0 | 0 | 3  | 0 | 12  | 0.03251334 | 2          | 0 | 4  | 0  | 0  | 0 |   |
| 27 | 0.14236623 | 2 | 0 |    |    |   |    |    |            |   |   |   |   |    |   |     |            |            |   |    |    |    |   |   |

|               |   |   |    |    |    |                |   |    |    |    |                |                |   |    |    |   |   |
|---------------|---|---|----|----|----|----------------|---|----|----|----|----------------|----------------|---|----|----|---|---|
| 30 -0.1017257 | 2 | 0 | 2  | 6  | 0  | 75 -0.8077959  | 1 | 0  | 0  | 0  | 108 -0.0297885 | 3              | 0 | 0  | 4  | 0 |   |
| 30 -0.1017257 | 2 | 0 | 1  | 4  | 2  | 75 -0.8077959  | 3 | 0  | 0  | 10 | 108 -0.0297885 | 2              | 0 | 3  | 0  | 0 |   |
| 30 -0.1017257 | 2 | 0 | 0  | 10 | 0  | 75 -0.8077959  | 3 | 0  | 0  | 6  | 108 -0.0297885 | 2              | 0 | 9  | 1  | 0 |   |
| 30 -0.1017257 | 2 | 0 | 0  | 7  | 0  | 75 -0.8077959  | 4 | 0  | 0  | 3  | 108 -0.0297885 | 2              | 0 | 2  | 3  | 0 |   |
| 30 -0.1017257 | 2 | 0 | 3  | 0  | 6  | 75 -0.8077959  | 1 | 5  | 0  | 0  | 108 -0.0297885 | 2              | 0 | 5  | 2  | 0 |   |
| 30 -0.1017257 | 2 | 0 | 3  | 0  | 10 | 75 -0.8077959  | 1 | 12 | 0  | 0  | 108 -0.0297885 | 2              | 0 | 0  | 10 | 0 |   |
| 30 -0.1017257 | 2 | 0 | 7  | 2  | 0  | 75 -0.8077959  | 1 | 7  | 0  | 0  | 108 -0.0297885 | 3              | 0 | 2  | 5  | 0 |   |
| 30 -0.1017257 | 2 | 0 | 3  | 0  | 6  | 75 -0.8077959  | 1 | 7  | 0  | 0  | 108 -0.0297885 | 2              | 0 | 1  | 4  | 0 |   |
| 30 -0.1017257 | 2 | 0 | 3  | 0  | 3  | 75 -0.8077959  | 3 | 0  | 0  | 0  | 108 -0.0297885 | 2              | 0 | 6  | 8  | 0 |   |
| 30 -0.1017257 | 2 | 3 | 1  | 0  | 2  | 75 -0.8077959  | 4 | 5  | 0  | 0  | 108 -0.0297885 | 3              | 0 | 0  | 8  | 0 |   |
| 30 -0.1017257 | 1 | 2 | 0  | 0  | 4  | 76 -0.2397604  | 3 | 5  | 0  | 2  | 108 -0.0297885 | 3              | 0 | 0  | 12 | 0 |   |
| 30 -0.1017257 | 1 | 5 | 0  | 0  | 1  | 76 -0.2397604  | 3 | 2  | 0  | 3  | 108 -0.0297885 | 3              | 0 | 0  | 5  | 0 |   |
| 30 -0.1017257 | 4 | 0 | 0  | 0  | 0  | 76 -0.2397604  | 4 | 0  | 0  | 10 | 108 -0.0297885 | 3              | 0 | 1  | 6  | 0 |   |
| 30 -0.1017257 | 4 | 0 | 2  | 0  | 2  | 76 -0.2397604  | 4 | 0  | 0  | 9  | 108 -0.0297885 | 3              | 0 | 0  | 4  | 3 |   |
| 30 -0.1017257 | 2 | 0 | 1  | 0  | 6  | 45 -1.162141   | 1 | 6  | 0  | 1  | 108 -0.0297885 | 4              | 0 | 3  | 2  | 1 |   |
| 31 0.27911465 | 4 | 0 | 3  | 1  | 2  | 45 -1.162141   | 1 | 0  | 0  | 6  | 108 -0.0297885 | 2              | 0 | 6  | 0  | 0 |   |
| 31 0.27911465 | 4 | 0 | 0  | 3  | 4  | 45 -1.162141   | 3 | 3  | 0  | 6  | 108 -0.0297885 | 2              | 0 | 10 | 0  | 0 |   |
| 31 0.27911465 | 4 | 0 | 0  | 3  | 2  | 45 -1.162141   | 4 | 3  | 0  | 0  | 108 -0.0297885 | 3              | 0 | 0  | 0  | 0 |   |
| 31 0.27911465 | 4 | 2 | 1  | 0  | 7  | 45 -1.162141   | 4 | 3  | 0  | 0  | 108 -0.0297885 | 2              | 0 | 4  | 0  | 0 |   |
| 31 0.27911465 | 4 | 0 | 0  | 0  | 12 | 45 -1.162141   | 1 | 7  | 0  | 0  | 108 -0.0297885 | 3              | 0 | 7  | 0  | 0 |   |
| 31 0.27911465 | 4 | 0 | 2  | 0  | 7  | 45 -1.162141   | 4 | 0  | 0  | 9  | 108 -0.0297885 | 1              | 2 | 0  | 0  | 0 |   |
| 31 0.27911465 | 4 | 0 | 0  | 0  | 5  | 45 -1.162141   | 1 | 7  | 0  | 0  | 108 -0.0297885 | 1              | 4 | 2  | 0  | 0 |   |
| 31 0.27911465 | 4 | 0 | 6  | 0  | 0  | 45 -1.162141   | 1 | 4  | 0  | 0  | 108 -0.0297885 | 4              | 5 | 0  | 1  | 3 |   |
| 31 0.27911465 | 4 | 0 | 8  | 0  | 0  | 45 -1.162141   | 1 | 4  | 0  | 1  | 108 -0.0297885 | 4              | 1 | 0  | 0  | 8 |   |
| 31 0.27911465 | 4 | 0 | 0  | 2  | 6  | 45 -1.162141   | 3 | 6  | 0  | 0  | 108 -0.0297885 | 4              | 0 | 0  | 0  | 2 |   |
| 31 0.27911465 | 4 | 0 | 2  | 0  | 2  | 45 -1.162141   | 1 | 12 | 0  | 0  | 108 -0.0297885 | 4              | 0 | 0  | 0  | 5 |   |
| 31 0.27911465 | 4 | 0 | 5  | 0  | 3  | 45 -1.162141   | 3 | 0  | 0  | 7  | 108 -0.0297885 | 1              | 6 | 0  | 0  | 0 |   |
| 31 0.27911465 | 4 | 3 | 2  | 0  | 3  | 45 -1.162141   | 3 | 0  | 0  | 5  | 108 -0.0297885 | 4              | 0 | 0  | 0  | 8 |   |
| 31 0.27911465 | 4 | 0 | 0  | 0  | 7  | 45 -1.162141   | 3 | 0  | 0  | 7  | 108 -0.0297885 | 4              | 0 | 0  | 0  | 9 |   |
| 31 0.27911465 | 4 | 0 | 0  | 0  | 6  | 45 -1.162141   | 3 | 0  | 0  | 6  | 108 -0.0297885 | 4              | 4 | 0  | 0  | 1 |   |
| 31 0.27911465 | 4 | 0 | 0  | 0  | 7  | 45 -1.162141   | 3 | 0  | 0  | 4  | 108 -0.0297885 | 4              | 0 | 0  | 0  | 6 |   |
| 31 0.27911465 | 4 | 0 | 0  | 0  | 7  | 45 -1.162141   | 3 | 0  | 0  | 2  | 108 -0.0297885 | 4              | 0 | 0  | 0  | 6 |   |
| 31 0.27911465 | 4 | 0 | 0  | 0  | 8  | 45 -1.162141   | 3 | 7  | 0  | 0  | 108 -0.0297885 | 4              | 0 | 0  | 0  | 6 |   |
| 31 0.27911465 | 4 | 0 | 0  | 0  | 8  | 45 -1.162141   | 1 | 7  | 0  | 0  | 108 -0.0297885 | 3              | 0 | 7  | 0  | 0 |   |
| 31 0.27911465 | 4 | 0 | 0  | 0  | 8  | 77 -0.7695051  | 1 | 6  | 0  | 0  | 83 -0.1574278  | 3              | 0 | 5  | 0  | 0 |   |
| 32 -0.8084256 | 2 | 0 | 4  | 0  | 2  | 45 -1.162141   | 1 | 8  | 0  | 0  | 83 -0.1574278  | 2              | 0 | 0  | 4  | 2 |   |
| 32 -0.8084256 | 2 | 0 | 0  | 0  | 5  | 45 -1.162141   | 1 | 2  | 0  | 0  | 83 -0.1574278  | 3              | 0 | 9  | 0  | 0 |   |
| 33 -0.9658134 | 4 | 0 | 4  | 0  | 4  | 77 -0.7695051  | 3 | 4  | 0  | 1  | 83 -0.1574278  | 3              | 0 | 2  | 3  | 0 |   |
| 33 -0.9658134 | 4 | 2 | 2  | 0  | 2  | 77 -0.7695051  | 4 | 0  | 0  | 9  | 83 -0.1574278  | 2              | 0 | 4  | 1  | 0 |   |
| 33 -0.9658134 | 4 | 0 | 0  | 0  | 8  | 77 -0.7695051  | 4 | 1  | 0  | 0  | 83 -0.1574278  | 3              | 0 | 3  | 4  | 0 |   |
| 33 -0.9658134 | 4 | 0 | 4  | 1  | 2  | 77 -0.7695051  | 1 | 6  | 0  | 0  | 83 -0.1574278  | 3              | 0 | 2  | 4  | 0 |   |
| 33 -0.9658134 | 4 | 0 | 0  | 0  | 0  | 77 -0.7695051  | 1 | 8  | 0  | 0  | 83 -0.1574278  | 3              | 3 | 0  | 6  | 0 |   |
| 33 -0.9658134 | 4 | 0 | 3  | 0  | 4  | 77 -0.7695051  | 4 | 0  | 0  | 2  | 83 -0.1574278  | 3              | 1 | 0  | 6  | 0 |   |
| 33 -0.9658134 | 4 | 0 | 0  | 0  | 16 | 77 -0.7695051  | 3 | 0  | 0  | 9  | 83 -0.1574278  | 4              | 0 | 0  | 8  | 2 |   |
| 33 -0.9658134 | 4 | 0 | 2  | 0  | 6  | 77 -0.7695051  | 1 | 7  | 0  | 0  | 83 -0.1574278  | 2              | 0 | 7  | 0  | 0 |   |
| 33 -0.9658134 | 4 | 0 | 0  | 0  | 0  | 77 -0.7695051  | 1 | 5  | 0  | 0  | 83 -0.1574278  | 3              | 0 | 6  | 0  | 0 |   |
| 33 -0.9658134 | 4 | 0 | 4  | 0  | 4  | 34 -0.0341764  | 1 | 0  | 0  | 6  | 83 -0.1574278  | 2              | 0 | 9  | 0  | 0 |   |
| 33 -0.9658134 | 4 | 0 | 0  | 0  | 11 | 34 -0.0341764  | 1 | 0  | 0  | 0  | 83 -0.1574278  | 2              | 0 | 5  | 1  | 0 |   |
| 33 -0.9658134 | 4 | 0 | 2  | 3  | 3  | 34 -0.0341764  | 1 | 7  | 0  | 0  | 83 -0.1574278  | 3              | 0 | 5  | 2  | 0 |   |
| 33 -0.9658134 | 4 | 0 | 9  | 1  | 0  | 34 -0.0341764  | 1 | 4  | 0  | 0  | 83 -0.1574278  | 3              | 4 | 2  | 3  | 0 |   |
| 33 -0.9658134 | 4 | 0 | 2  | 2  | 2  | 34 -0.0341764  | 1 | 5  | 0  | 0  | 83 -0.1574278  | 3              | 0 | 1  | 7  | 0 |   |
| 33 -0.9658134 | 4 | 0 | 5  | 0  | 2  | 34 -0.0341764  | 1 | 4  | 0  | 0  | 83 -0.1574278  | 3              | 0 | 2  | 0  | 0 |   |
| 33 -0.9658134 | 4 | 0 | 1  | 0  | 6  | 78 -0.1284139  | 4 | 0  | 0  | 0  | 83 -0.1574278  | 1              | 7 | 2  | 0  | 0 |   |
| 33 -0.9658134 | 4 | 0 | 9  | 0  | 3  | 78 -0.1284139  | 3 | 0  | 0  | 0  | 83 -0.1574278  | 2              | 0 | 0  | 7  | 0 |   |
| 33 -0.9658134 | 4 | 2 | 0  | 0  | 6  | 78 -0.1284139  | 3 | 0  | 0  | 4  | 83 -0.1574278  | 1              | 0 | 0  | 8  | 0 |   |
| 33 -0.9658134 | 4 | 0 | 0  | 0  | 1  | 79 -1.0914428  | 1 | 4  | 0  | 2  | 83 -0.1574278  | 1              | 4 | 0  | 0  | 4 |   |
| 33 -0.9658134 | 4 | 2 | 2  | 0  | 1  | 79 -1.0914428  | 1 | 8  | 0  | 0  | 83 -0.1574278  | 1              | 4 | 0  | 0  | 4 |   |
| 33 -0.9658134 | 4 | 2 | 2  | 0  | 0  | 79 -1.0914428  | 4 | 0  | 0  | 8  | 83 -0.1574278  | 1              | 2 | 0  | 0  | 8 |   |
| 33 -0.9658134 | 4 | 6 | 0  | 0  | 2  | 79 -1.0914428  | 1 | 4  | 0  | 0  | 83 -0.1574278  | 3              | 0 | 0  | 3  | 4 |   |
| 33 -0.9658134 | 4 | 5 | 0  | 0  | 2  | 79 -1.0914428  | 1 | 4  | 0  | 0  | 83 -0.1574278  | 4              | 5 | 0  | 0  | 2 |   |
| 33 -0.9658134 | 4 | 3 | 2  | 0  | 5  | 80 -0.2570778  | 1 | 0  | 0  | 4  | 83 -0.1574278  | 2              | 0 | 0  | 0  | 8 |   |
| 33 -0.9658134 | 4 | 2 | 0  | 0  | 4  | 80 -0.2570778  | 4 | 0  | 0  | 0  | 85 -0.16154037 | 2              | 0 | 0  | 0  | 0 |   |
| 33 -0.9658134 | 4 | 0 | 1  | 1  | 4  | 81 -0.5904784  | 1 | 4  | 0  | 0  | 85 -0.16154037 | 2              | 0 | 6  | 0  | 0 |   |
| 33 -0.9658134 | 4 | 0 | 1  | 2  | 5  | 81 -0.5904784  | 4 | 0  | 4  | 0  | 85 -0.16154037 | 3              | 0 | 7  | 0  | 0 |   |
| 33 -0.9658134 | 4 | 0 | 1  | 0  | 8  | 81 -0.5904784  | 2 | 0  | 4  | 5  | 0              | 85 -0.16154037 | 3 | 1  | 0  | 3 | 0 |
| 33 -0.9658134 | 4 | 0 | 0  | 0  | 15 | 81 -0.5904784  | 2 | 8  | 0  | 0  | 85 -0.16154037 | 2              | 1 | 0  | 2  | 0 |   |
| 33 -0.9658134 | 4 | 2 | 0  | 0  | 5  | 67 -0.28948928 | 2 | 0  | 0  | 9  | 85 -0.16154037 | 2              | 4 | 0  | 0  | 0 |   |
| 34 -0.0341764 | 2 | 0 | 2  | 0  | 6  | 82 -0.00219736 | 1 | 0  | 0  | 0  | 85 -0.16154037 | 2              | 0 | 3  | 0  | 0 |   |
| 34 -0.0341764 | 2 | 0 | 0  | 0  | 0  | 82 -0.00219736 | 2 | 0  | 15 | 0  | 85 -0.16154037 | 3              | 0 | 3  | 6  | 0 |   |
| 34 -0.0341764 | 2 | 0 | 0  | 0  | 11 | 82 -0.00219736 | 1 | 7  | 0  | 0  | 85 -0.16154037 | 2              | 0 | 6  | 0  | 0 |   |
| 34 -0.0341764 | 2 | 0 | 2  | 2  | 4  | 59 -0.6506817  | 3 | 0  | 0  | 0  | 85 -0.16154037 | 2              | 0 | 1  | 1  | 0 |   |
| 34 -0.0341764 | 2 | 3 | 3  | 0  | 0  | 59 -0.6506817  | 3 | 0  | 0  | 0  | 85 -0.16154037 | 2              | 0 | 1  | 2  | 0 |   |
| 34 -0.0341764 | 2 | 3 | 2  | 0  | 2  | 59 -0.6506817  | 3 | 0  | 0  | 0  | 85 -0.16154037 | 2              | 0 | 9  | 0  | 0 |   |
| 34 -0.0341764 | 2 | 3 | 2  | 0  | 2  | 59 -0.6506817  | 3 | 0  | 0  | 0  | 85 -0.16154037 | 2              | 0 | 2  | 6  | 0 |   |
| 34 -0.0341764 | 2 | 0 | 0  | 0  | 3  | 59 -0.6506817  | 3 | 0  | 0  | 0  | 85 -0.16154037 | 3              | 0 | 2  | 4  | 0 |   |
| 34 -0.0341764 | 2 | 0 | 3  | 0  | 5  | 59 -0.6506817  | 3 | 0  | 0  | 0  | 85 -0.16154037 | 3              | 0 | 0  | 8  | 0 |   |
| 34 -0.0341764 | 2 | 0 | 4  | 0  | 1  | 59 -0.6506817  | 3 | 0  | 0  | 0  | 85 -0.16154037 | 4              | 0 | 0  | 4  | 2 |   |
| 34 -0.0341764 | 4 | 0 | 0  | 0  | 0  | 59 -0.6506817  | 1 | 5  | 0  | 0  | 85 -0.16154037 | 2              | 0 | 3  | 2  | 0 |   |
| 35 0.88994369 | 4 | 0 | 0  | 0  | 5  | 59 -0.6506817  | 1 | 4  | 0  | 0  | 85 -0.16154037 | 2              | 0 | 2  | 0  | 0 |   |
| 35 0.88994369 | 1 | 1 | 0  | 0  | 8  | 59 -0.6506817  | 1 | 6  | 0  | 0  | 85 -0.16154037 | 2              | 0 | 2  | 0  | 0 |   |
| 35 0.88994369 | 1 | 7 | 0  | 0  | 3  | 59 -0.6506817  | 1 | 9  | 0  | 0  | 85 -0.16154037 | 2              | 0 | 6  | 0  | 0 |   |
| 35 0.88994369 | 1 | 9 | 0  | 0  | 1  | 59 -0.6506817  | 1 | 6  | 0  | 0  | 85 -0.16154037 | 2              | 0 | 2  | 5  | 0 |   |
| 35 0.88994369 | 1 | 8 | 0  | 0  | 0  | 59 -0.6506817  | 1 | 9  | 0  | 0  | 85 -0.16154037 | 2              | 0 | 9  | 0  | 0 |   |
| 35 0.88994369 | 1 | 8 | 0  | 0  | 0  | 59 -0.6506817  | 1 | 6  | 0  | 2  | 85 -0.16154037 | 2              | 0 | 8  | 0  | 0 |   |
| 35 0.88994369 | 1 | 8 | 0  | 0  | 0  | 59 -0.6506817  | 1 | 8  | 0  | 1  | 85 -0.16154037 | 3              | 0 | 0  | 3  | 0 |   |
| 35 0.88994369 | 2 | 0 | 12 | 0  | 0  | 59 -0.6506817  | 1 | 9  | 0  | 0  | 85 -0.16154037 | 3              | 0 | 0  | 10 | 0 |   |
| 35 0.88994369 | 2 | 0 | 4  | 0  | 0  | 59 -0.6506817  | 1 | 11 | 0  | 0  | 85 -0.16154037 | 3              | 0 | 0  | 7  | 0 |   |
| 35 0.88994369 | 3 | 0 | 6  | 3  | 0  | 59 -0.6506817  | 3 | 4  | 0  | 3  | 85 -0.16154037 | 1              | 4 | 0  | 3  | 3 |   |
| 35 0.88994369 |   |   |    |    |    |                |   |    |    |    |                |                |   |    |    |   |   |

|    |            |   |    |    |   |    |    |            |   |    |   |   |   |     |            |   |    |   |    |    |    |
|----|------------|---|----|----|---|----|----|------------|---|----|---|---|---|-----|------------|---|----|---|----|----|----|
| 37 | -0.7675263 | 2 | 0  | 5  | 0 | 0  | 12 | 0.03251334 | 2 | 0  | 0 | 0 | 0 | 118 | -0.0647231 | 4 | 0  | 0 | 0  | 0  | 11 |
| 37 | -0.7675263 | 4 | 0  | 0  | 0 | 6  | 13 | -0.6454721 | 1 | 4  | 6 | 0 | 0 | 86  | -0.9389541 | 1 | 2  | 0 | 0  | 2  | 1  |
| 37 | -0.7675263 | 1 | 2  | 0  | 0 | 8  | 13 | -0.6454721 | 2 | 6  | 0 | 0 | 0 | 86  | -0.9389541 | 3 | 0  | 0 | 0  | 11 | 0  |
| 37 | -0.7675263 | 2 | 1  | 4  | 0 | 3  | 13 | -0.6454721 | 1 | 13 | 0 | 0 | 0 | 86  | -0.9389541 | 3 | 1  | 0 | 0  | 5  | 0  |
| 37 | -0.7675263 | 3 | 0  | 4  | 0 | 0  | 13 | -0.6454721 | 1 | 3  | 0 | 0 | 0 | 86  | -0.9389541 | 3 | 0  | 0 | 0  | 8  | 0  |
| 37 | -0.7675263 | 4 | 0  | 2  | 4 | 0  | 13 | -0.6454721 | 1 | 7  | 0 | 0 | 0 | 86  | -0.9389541 | 4 | 0  | 3 | 4  | 4  | 0  |
| 37 | -0.7675263 | 4 | 0  | 1  | 0 | 3  | 13 | -0.6454721 | 1 | 0  | 0 | 0 | 0 | 86  | -0.9389541 | 3 | 0  | 4 | 3  | 0  | 0  |
| 37 | -0.7675263 | 4 | 0  | 0  | 0 | 3  | 13 | -0.6454721 | 2 | 3  | 0 | 0 | 0 | 86  | -0.9389541 | 1 | 1  | 5 | 1  | 4  | 0  |
| 37 | -0.7675263 | 4 | 0  | 6  | 5 | 4  | 13 | -0.6454721 | 2 | 0  | 5 | 1 | 3 | 86  | -0.9389541 | 3 | 0  | 0 | 5  | 5  | 0  |
| 37 | -0.7675263 | 4 | 0  | 0  | 0 | 8  | 83 | -0.1574278 | 1 | 6  | 0 | 0 | 0 | 86  | -0.9389541 | 4 | 1  | 0 | 0  | 1  | 0  |
| 37 | -0.7675263 | 4 | 0  | 0  | 0 | 4  | 83 | -0.1574278 | 1 | 11 | 0 | 0 | 0 | 86  | -0.9389541 | 3 | 0  | 0 | 0  | 0  | 3  |
| 37 | -0.7675263 | 4 | 0  | 0  | 0 | 4  | 83 | -0.1574278 | 1 | 3  | 0 | 0 | 0 | 86  | -0.9389541 | 3 | 0  | 0 | 11 | 0  | 0  |
| 37 | -0.7675263 | 4 | 0  | 0  | 0 | 7  | 83 | -0.1574278 | 1 | 13 | 0 | 0 | 0 | 86  | -0.9389541 | 3 | 0  | 0 | 10 | 0  | 0  |
| 37 | -0.7675263 | 4 | 0  | 0  | 0 | 6  | 83 | -0.1574278 | 1 | 11 | 0 | 0 | 0 | 86  | -0.9389541 | 3 | 1  | 0 | 0  | 6  | 0  |
| 37 | -0.7675263 | 4 | 0  | 0  | 0 | 9  | 83 | -0.1574278 | 1 | 8  | 0 | 0 | 0 | 86  | -0.9389541 | 4 | 2  | 0 | 0  | 2  | 0  |
| 37 | -0.7675263 | 4 | 0  | 0  | 0 | 0  | 83 | -0.1574278 | 1 | 0  | 0 | 0 | 0 | 86  | -0.9389541 | 4 | 3  | 0 | 0  | 0  | 5  |
| 37 | -0.7675263 | 4 | 0  | 0  | 0 | 0  | 83 | -0.1574278 | 1 | 0  | 0 | 0 | 0 | 86  | -0.9389541 | 4 | 0  | 0 | 0  | 0  | 0  |
| 37 | -0.7675263 | 4 | 0  | 0  | 0 | 0  | 83 | -0.1574278 | 1 | 0  | 0 | 0 | 0 | 58  | 0.44441689 | 3 | 3  | 1 | 2  | 1  | 0  |
| 37 | -0.7675263 | 1 | 10 | 0  | 0 | 0  | 83 | -0.1574278 | 1 | 0  | 0 | 0 | 0 | 58  | 0.44441689 | 3 | 1  | 7 | 1  | 2  | 1  |
| 37 | -0.7675263 | 4 | 0  | 0  | 0 | 9  | 83 | -0.1574278 | 1 | 7  | 0 | 0 | 0 | 58  | 0.44441689 | 2 | 0  | 2 | 2  | 0  | 0  |
| 37 | -0.7675263 | 4 | 0  | 0  | 0 | 0  | 83 | -0.1574278 | 1 | 2  | 0 | 1 | 0 | 58  | 0.44441689 | 3 | 0  | 4 | 4  | 4  | 0  |
| 37 | -0.7675263 | 4 | 0  | 0  | 0 | 0  | 83 | -0.1574278 | 3 | 5  | 0 | 0 | 0 | 58  | 0.44441689 | 1 | 0  | 8 | 0  | 0  | 0  |
| 37 | -0.7675263 | 4 | 0  | 0  | 0 | 11 | 83 | -0.1574278 | 1 | 12 | 0 | 0 | 0 | 58  | 0.44441689 | 3 | 0  | 0 | 0  | 0  | 6  |
| 37 | -0.7675263 | 4 | 0  | 0  | 0 | 9  | 83 | -0.1574278 | 1 | 5  | 0 | 0 | 0 | 58  | 0.44441689 | 4 | 4  | 0 | 0  | 0  | 4  |
| 38 | -0.6944448 | 1 | 8  | 0  | 0 | 1  | 83 | -0.1574278 | 1 | 8  | 0 | 0 | 0 | 58  | 0.44441689 | 1 | 4  | 0 | 0  | 0  | 4  |
| 38 | -0.6944448 | 4 | 0  | 0  | 0 | 0  | 58 | 0.44441689 | 2 | 4  | 0 | 0 | 0 | 58  | 0.44441689 | 4 | 2  | 0 | 0  | 0  | 0  |
| 38 | -0.6944448 | 4 | 1  | 0  | 0 | 12 | 58 | 0.44441689 | 1 | 4  | 0 | 0 | 0 | 58  | 0.44441689 | 4 | 0  | 0 | 0  | 0  | 0  |
| 38 | -0.6944448 | 2 | 2  | 3  | 0 | 0  | 58 | 0.44441689 | 1 | 10 | 0 | 0 | 0 | 58  | 0.44441689 | 4 | 0  | 0 | 0  | 0  | 10 |
| 38 | -0.6944448 | 2 | 0  | 7  | 0 | 0  | 58 | 0.44441689 | 1 | 5  | 0 | 0 | 0 | 57  | 0.46721311 | 3 | 2  | 2 | 5  | 1  | 0  |
| 38 | -0.6944448 | 2 | 0  | 2  | 1 | 1  | 58 | 0.44441689 | 1 | 3  | 0 | 0 | 0 | 57  | 0.46721311 | 4 | 3  | 4 | 1  | 1  | 2  |
| 38 | -0.6944448 | 2 | 0  | 9  | 0 | 0  | 58 | 0.44441689 | 1 | 5  | 0 | 1 | 0 | 57  | 0.46721311 | 3 | 2  | 0 | 2  | 2  | 2  |
| 38 | -0.6944448 | 2 | 0  | 3  | 5 | 4  | 58 | 0.44441689 | 0 | 0  | 0 | 0 | 0 | 57  | 0.46721311 | 3 | 0  | 0 | 2  | 7  | 0  |
| 38 | -0.6944448 | 4 | 0  | 0  | 1 | 11 | 58 | 0.44441689 | 1 | 0  | 0 | 0 | 0 | 57  | 0.46721311 | 2 | 1  | 2 | 1  | 0  | 0  |
| 38 | -0.6944448 | 4 | 0  | 0  | 0 | 3  | 58 | 0.44441689 | 1 | 7  | 0 | 0 | 0 | 57  | 0.46721311 | 2 | 0  | 3 | 0  | 0  | 0  |
| 38 | -0.6944448 | 4 | 1  | 0  | 0 | 8  | 58 | 0.44441689 | 1 | 12 | 0 | 0 | 0 | 57  | 0.46721311 | 2 | 0  | 4 | 4  | 0  | 0  |
| 38 | -0.6944448 | 4 | 0  | 0  | 0 | 7  | 58 | 0.44441689 | 1 | 12 | 0 | 0 | 0 | 57  | 0.46721311 | 2 | 0  | 4 | 0  | 0  | 0  |
| 38 | -0.6944448 | 4 | 0  | 0  | 0 | 6  | 58 | 0.44441689 | 2 | 0  | 0 | 0 | 8 | 57  | 0.46721311 | 4 | 0  | 2 | 2  | 2  | 2  |
| 38 | -0.6944448 | 4 | 0  | 0  | 0 | 10 | 57 | 0.46721311 | 1 | 12 | 0 | 0 | 0 | 57  | 0.46721311 | 3 | 0  | 0 | 0  | 0  | 0  |
| 38 | -0.6944448 | 4 | 0  | 0  | 0 | 6  | 57 | 0.46721311 | 1 | 9  | 0 | 0 | 0 | 57  | 0.46721311 | 2 | 0  | 2 | 1  | 0  | 0  |
| 38 | -0.6944448 | 4 | 0  | 0  | 0 | 0  | 57 | 0.46721311 | 2 | 0  | 8 | 0 | 0 | 57  | 0.46721311 | 3 | 0  | 0 | 0  | 9  | 0  |
| 38 | -0.6944448 | 4 | 0  | 0  | 0 | 1  | 57 | 0.46721311 | 4 | 0  | 0 | 0 | 0 | 57  | 0.46721311 | 3 | 1  | 0 | 2  | 1  | 0  |
| 38 | -0.6944448 | 4 | 0  | 0  | 0 | 8  | 62 | -0.8150679 | 1 | 8  | 0 | 0 | 0 | 57  | 0.46721311 | 4 | 5  | 0 | 0  | 0  | 0  |
| 38 | -0.6944448 | 4 | 0  | 0  | 0 | 8  | 62 | -0.8150679 | 1 | 8  | 0 | 0 | 0 | 57  | 0.46721311 | 1 | 5  | 0 | 0  | 0  | 2  |
| 38 | -0.6944448 | 4 | 0  | 0  | 0 | 3  | 62 | -0.8150679 | 1 | 2  | 0 | 0 | 0 | 57  | 0.46721311 | 4 | 1  | 0 | 0  | 4  | 0  |
| 38 | -0.6944448 | 4 | 1  | 0  | 0 | 2  | 62 | -0.8150679 | 1 | 11 | 0 | 0 | 0 | 57  | 0.46721311 | 1 | 11 | 0 | 0  | 0  | 0  |
| 38 | -0.6944448 | 1 | 3  | 0  | 0 | 0  | 62 | -0.8150679 | 1 | 1  | 0 | 0 | 0 | 57  | 0.46721311 | 4 | 0  | 0 | 0  | 9  | 0  |
| 38 | -0.6944448 | 1 | 3  | 0  | 0 | 0  | 62 | -0.8150679 | 1 | 5  | 0 | 0 | 0 | 57  | 0.46721311 | 4 | 0  | 0 | 0  | 2  | 0  |
| 38 | -0.6944448 | 4 | 6  | 0  | 0 | 1  | 62 | -0.8150679 | 1 | 4  | 0 | 0 | 0 | 57  | 0.46721311 | 4 | 0  | 0 | 0  | 0  | 8  |
| 38 | -0.6944448 | 4 | 0  | 0  | 0 | 4  | 60 | 0.26196807 | 1 | 0  | 0 | 0 | 0 | 57  | 0.46721311 | 4 | 0  | 0 | 0  | 0  | 11 |
| 39 | -0.8941953 | 4 | 0  | 0  | 0 | 10 | 60 | 0.26196807 | 1 | 9  | 0 | 0 | 0 | 57  | 0.46721311 | 4 | 0  | 0 | 0  | 0  | 0  |
| 39 | -0.8941953 | 4 | 0  | 0  | 0 | 3  | 60 | 0.26196807 | 3 | 0  | 0 | 0 | 0 | 57  | 0.46721311 | 4 | 0  | 0 | 0  | 4  | 0  |
| 39 | -0.8941953 | 4 | 0  | 0  | 0 | 6  | 60 | 0.26196807 | 1 | 0  | 0 | 0 | 0 | 115 | -0.6635707 | 1 | 2  | 1 | 2  | 0  | 0  |
| 39 | -0.8941953 | 4 | 0  | 0  | 0 | 7  | 60 | 0.26196807 | 1 | 0  | 0 | 0 | 0 | 115 | -0.6635707 | 1 | 0  | 0 | 0  | 0  | 0  |
| 39 | -0.8941953 | 4 | 0  | 0  | 0 | 7  | 60 | 0.26196807 | 1 | 5  | 0 | 0 | 0 | 115 | -0.6635707 | 2 | 0  | 2 | 1  | 0  | 0  |
| 39 | -0.8941953 | 4 | 0  | 0  | 0 | 10 | 60 | 0.26196807 | 1 | 11 | 0 | 0 | 0 | 115 | -0.6635707 | 2 | 0  | 3 | 5  | 0  | 0  |
| 39 | -0.8941953 | 4 | 0  | 0  | 0 | 7  | 60 | 0.26196807 | 1 | 0  | 0 | 0 | 0 | 115 | -0.6635707 | 1 | 0  | 2 | 4  | 0  | 0  |
| 39 | -0.8941953 | 3 | 1  | 0  | 4 | 2  | 60 | 0.26196807 | 1 | 3  | 0 | 0 | 0 | 115 | -0.6635707 | 3 | 0  | 1 | 5  | 0  | 0  |
| 39 | -0.8941953 | 4 | 1  | 0  | 0 | 10 | 60 | 0.26196807 | 1 | 2  | 0 | 0 | 0 | 115 | -0.6635707 | 3 | 0  | 6 | 1  | 0  | 0  |
| 39 | -0.8941953 | 4 | 1  | 0  | 0 | 4  | 60 | 0.26196807 | 1 | 7  | 0 | 0 | 0 | 115 | -0.6635707 | 2 | 0  | 4 | 0  | 0  | 0  |
| 39 | -0.8941953 | 4 | 1  | 0  | 1 | 3  | 60 | 0.26196807 | 1 | 5  | 0 | 0 | 0 | 115 | -0.6635707 | 2 | 0  | 2 | 7  | 0  | 0  |
| 39 | -0.8941953 | 1 | 1  | 1  | 2 | 2  | 60 | 0.26196807 | 1 | 11 | 0 | 0 | 0 | 115 | -0.6635707 | 3 | 0  | 0 | 7  | 0  | 0  |
| 39 | -0.8941953 | 2 | 2  | 4  | 0 | 0  | 60 | 0.26196807 | 3 | 0  | 0 | 8 | 0 | 115 | -0.6635707 | 4 | 2  | 0 | 3  | 1  | 0  |
| 39 | -0.8941953 | 2 | 0  | 2  | 3 | 2  | 60 | 0.26196807 | 3 | 0  | 0 | 4 | 0 | 115 | -0.6635707 | 1 | 3  | 0 | 3  | 2  | 0  |
| 39 | -0.8941953 | 2 | 0  | 11 | 0 | 0  | 60 | 0.26196807 | 4 | 0  | 0 | 0 | 0 | 115 | -0.6635707 | 1 | 0  | 0 | 0  | 6  | 0  |
| 39 | -0.8941953 | 2 | 0  | 7  | 0 | 0  | 60 | 0.26196807 | 1 | 0  | 4 | 0 | 0 | 115 | -0.6635707 | 4 | 1  | 0 | 0  | 7  | 0  |
| 39 | -0.8941953 | 2 | 0  | 8  | 1 | 6  | 17 | -0.5629747 | 1 | 6  | 0 | 0 | 0 | 115 | -0.6635707 | 4 | 0  | 0 | 3  | 4  | 0  |
| 39 | -0.8941953 | 2 | 0  | 0  | 0 | 6  | 17 | -0.5629747 | 1 | 7  | 0 | 0 | 0 | 59  | -0.6506817 | 3 | 0  | 7 | 0  | 0  | 0  |
| 39 | -0.8941953 | 4 | 0  | 0  | 0 | 4  | 17 | -0.5629747 | 1 | 8  | 0 | 0 | 0 | 59  | -0.6506817 | 2 | 0  | 5 | 0  | 0  | 0  |
| 39 | -0.8941953 | 4 | 0  | 0  | 0 | 11 | 17 | -0.5629747 | 1 | 0  | 0 | 0 | 0 | 59  | -0.6506817 | 2 | 0  | 0 | 0  | 0  | 0  |
| 39 | -0.8941953 | 4 | 0  | 0  | 0 | 11 | 17 | -0.5629747 | 1 | 6  | 0 | 0 | 0 | 59  | -0.6506817 | 3 | 0  | 4 | 7  | 0  | 0  |
| 39 | -0.8941953 | 4 | 2  | 0  | 0 | 4  | 17 | -0.5629747 | 1 | 0  | 0 | 7 | 0 | 59  | -0.6506817 | 2 | 0  | 0 | 5  | 0  | 0  |
| 39 | -0.8941953 | 4 | 0  | 0  | 0 | 4  | 84 | -1.0300019 | 1 | 9  | 0 | 0 | 0 | 59  | -0.6506817 | 4 | 0  | 0 | 7  | 0  | 0  |
| 39 | -0.8941953 | 4 | 0  | 0  | 0 | 5  | 84 | -1.0300019 | 1 | 7  | 0 | 0 | 0 | 59  | -0.6506817 | 2 | 0  | 7 | 0  | 0  | 0  |
| 39 | -0.8941953 | 4 | 4  | 0  | 0 | 3  | 84 | -1.0300019 | 1 | 0  | 0 | 0 | 0 | 59  | -0.6506817 | 2 | 0  | 0 | 10 | 0  | 0  |
| 39 | -0.8941953 | 2 | 2  | 2  | 0 | 2  | 84 | -1.0300019 | 2 | 0  | 0 | 0 | 0 | 59  | -0.6506817 | 2 | 0  | 0 | 5  | 3  | 0  |
| 39 |            |   |    |    |   |    |    |            |   |    |   |   |   |     |            |   |    |   |    |    |    |



|    |            |   |   |   |    |    |    |            |   |   |    |    |    |     |            |   |    |   |    |   |
|----|------------|---|---|---|----|----|----|------------|---|---|----|----|----|-----|------------|---|----|---|----|---|
| 43 | -0.2465452 | 2 | 0 | 4 | 0  | 0  | 85 | 0.16154037 | 3 | 0 | 0  | 7  | 0  | 64  | -0.5598805 | 2 | 2  | 4 | 0  | 0 |
| 43 | -0.2465452 | 2 | 0 | 0 | 3  | 0  | 85 | 0.16154037 | 3 | 0 | 1  | 3  | 0  | 64  | -0.5598805 | 3 | 0  | 2 | 4  | 0 |
| 43 | -0.2465452 | 2 | 0 | 7 | 0  | 0  | 82 | 0.00219736 | 4 | 0 | 0  | 0  | 11 | 64  | -0.5598805 | 4 | 1  | 0 | 0  | 3 |
| 43 | -0.2465452 | 2 | 0 | 5 | 0  | 0  | 82 | 0.00219736 | 4 | 0 | 0  | 0  | 4  | 113 | -0.3337907 | 2 | 0  | 7 | 7  | 1 |
| 43 | -0.2465452 | 2 | 0 | 7 | 0  | 1  | 82 | 0.00219736 | 4 | 0 | 0  | 0  | 8  | 113 | -0.3337907 | 3 | 0  | 9 | 0  | 0 |
| 43 | -0.2465452 | 3 | 0 | 0 | 2  | 5  | 82 | 0.00219736 | 4 | 2 | 1  | 0  | 1  | 113 | -0.3337907 | 4 | 0  | 0 | 0  | 5 |
| 43 | -0.2465452 | 4 | 0 | 0 | 0  | 7  | 82 | 0.00219736 | 1 | 4 | 0  | 0  | 2  | 81  | -0.5904784 | 3 | 0  | 0 | 6  | 0 |
| 43 | -0.2465452 | 4 | 2 | 0 | 0  | 3  | 82 | 0.00219736 | 4 | 4 | 1  | 0  | 2  | 81  | -0.5904784 | 3 | 0  | 0 | 5  | 0 |
| 43 | -0.2465452 | 1 | 1 | 9 | 0  | 3  | 82 | 0.00219736 | 4 | 2 | 5  | 0  | 3  | 81  | -0.5904784 | 3 | 2  | 0 | 0  | 4 |
| 43 | -0.2465452 | 1 | 0 | 0 | 0  | 0  | 82 | 0.00219736 | 4 | 2 | 0  | 0  | 4  | 81  | -0.5904784 | 4 | 3  | 0 | 0  | 3 |
| 43 | -0.2465452 | 3 | 0 | 3 | 4  | 0  | 82 | 0.00219736 | 3 | 0 | 0  | 0  | 3  | 81  | -0.5904784 | 4 | 0  | 0 | 0  | 7 |
| 43 | -0.2465452 | 4 | 0 | 1 | 0  | 8  | 82 | 0.00219736 | 4 | 1 | 0  | 1  | 2  | 119 | 0.06088944 | 3 | 2  | 0 | 8  | 0 |
| 43 | -0.2465452 | 4 | 0 | 0 | 0  | 3  | 82 | 0.00219736 | 1 | 0 | 0  | 0  | 6  | 119 | 0.06088944 | 4 | 0  | 0 | 9  | 0 |
| 43 | -0.2465452 | 1 | 6 | 0 | 0  | 0  | 82 | 0.00219736 | 4 | 0 | 0  | 1  | 9  | 119 | 0.06088944 | 4 | 4  | 0 | 3  | 1 |
| 43 | -0.2465452 | 1 | 2 | 0 | 0  | 4  | 82 | 0.00219736 | 4 | 0 | 0  | 0  | 1  | 119 | 0.06088944 | 4 | 1  | 0 | 0  | 7 |
| 43 | -0.2465452 | 4 | 4 | 0 | 0  | 3  | 82 | 0.00219736 | 4 | 0 | 0  | 0  | 3  | 119 | 0.06088944 | 4 | 0  | 0 | 4  | 5 |
| 43 | -0.2465452 | 1 | 0 | 0 | 0  | 3  | 82 | 0.00219736 | 4 | 0 | 0  | 1  | 3  | 119 | 0.06088944 | 4 | 0  | 0 | 0  | 8 |
| 43 | -0.2465452 | 1 | 6 | 0 | 0  | 0  | 82 | 0.00219736 | 4 | 0 | 0  | 0  | 9  | 119 | 0.06088944 | 4 | 0  | 0 | 0  | 5 |
| 43 | -0.2465452 | 1 | 0 | 0 | 0  | 3  | 82 | 0.00219736 | 4 | 0 | 0  | 0  | 9  | 119 | 0.06088944 | 4 | 0  | 0 | 0  | 2 |
| 44 | -0.8338155 | 4 | 1 | 0 | 0  | 7  | 82 | 0.00219736 | 4 | 2 | 0  | 0  | 1  | 62  | -0.8150679 | 4 | 3  | 0 | 0  | 4 |
| 44 | -0.8338155 | 4 | 0 | 0 | 0  | 11 | 82 | 0.00219736 | 3 | 3 | 0  | 0  | 2  | 62  | -0.8150679 | 4 | 5  | 0 | 0  | 1 |
| 44 | -0.8338155 | 4 | 0 | 0 | 0  | 0  | 82 | 0.00219736 | 2 | 8 | 0  | 0  | 0  | 62  | -0.8150679 | 4 | 0  | 0 | 0  | 7 |
| 44 | -0.8338155 | 4 | 0 | 0 | 0  | 7  | 82 | 0.00219736 | 2 | 3 | 4  | 0  | 0  | 62  | -0.8150679 | 4 | 0  | 0 | 0  | 7 |
| 44 | -0.8338155 | 4 | 0 | 0 | 0  | 8  | 82 | 0.00219736 | 3 | 0 | 3  | 2  | 0  | 62  | -0.8150679 | 3 | 8  | 0 | 0  | 0 |
| 44 | -0.8338155 | 4 | 0 | 0 | 0  | 7  | 82 | 0.00219736 | 2 | 0 | 5  | 0  | 0  | 114 | -0.4855974 | 4 | 4  | 0 | 0  | 2 |
| 45 | -1.162141  | 4 | 1 | 0 | 1  | 2  | 82 | 0.00219736 | 2 | 0 | 5  | 1  | 0  | 114 | -0.4855974 | 3 | 0  | 0 | 4  | 6 |
| 45 | -1.162141  | 2 | 3 | 9 | 0  | 0  | 82 | 0.00219736 | 2 | 0 | 0  | 4  | 3  | 114 | -0.4855974 | 4 | 0  | 0 | 0  | 4 |
| 45 | -1.162141  | 2 | 0 | 9 | 0  | 0  | 82 | 0.00219736 | 3 | 0 | 3  | 0  | 0  | 88  | -0.088144  | 1 | 0  | 0 | 0  | 0 |
| 45 | -1.162141  | 4 | 0 | 1 | 3  | 2  | 82 | 0.00219736 | 2 | 7 | 0  | 0  | 0  | 88  | -0.088144  | 4 | 0  | 0 | 0  | 4 |
| 45 | -1.162141  | 2 | 0 | 8 | 0  | 0  | 82 | 0.00219736 | 2 | 6 | 0  | 0  | 0  | 134 | -0.5095728 | 3 | 3  | 0 | 2  | 0 |
| 45 | -1.162141  | 2 | 0 | 8 | 0  | 2  | 82 | 0.00219736 | 3 | 0 | 0  | 0  | 0  | 134 | -0.5095728 | 3 | 0  | 0 | 4  | 0 |
| 45 | -1.162141  | 2 | 0 | 9 | 0  | 0  | 82 | 0.00219736 | 3 | 0 | 5  | 0  | 3  | 134 | -0.5095728 | 3 | 0  | 0 | 0  | 4 |
| 45 | -1.162141  | 2 | 0 | 9 | 0  | 0  | 82 | 0.00219736 | 3 | 0 | 2  | 0  | 0  | 134 | -0.5095728 | 3 | 0  | 0 | 0  | 0 |
| 45 | -1.162141  | 2 | 0 | 6 | 0  | 0  | 82 | 0.00219736 | 3 | 4 | 3  | 0  | 0  | 134 | -0.5095728 | 3 | 0  | 0 | 0  | 0 |
| 45 | -1.162141  | 2 | 0 | 5 | 0  | 0  | 82 | 0.00219736 | 3 | 0 | 4  | 3  | 0  | 134 | -0.5095728 | 3 | 0  | 0 | 1  | 1 |
| 45 | -1.162141  | 2 | 0 | 4 | 0  | 4  | 82 | 0.00219736 | 2 | 0 | 0  | 7  | 0  | 134 | -0.5095728 | 4 | 0  | 0 | 0  | 0 |
| 45 | -1.162141  | 4 | 0 | 0 | 2  | 4  | 82 | 0.00219736 | 2 | 2 | 3  | 4  | 0  | 134 | -0.5095728 | 3 | 0  | 0 | 3  | 2 |
| 45 | -1.162141  | 4 | 0 | 0 | 12 | 4  | 82 | 0.00219736 | 3 | 0 | 4  | 5  | 0  | 134 | -0.5095728 | 3 | 0  | 1 | 2  | 0 |
| 45 | -1.162141  | 4 | 0 | 0 | 10 | 0  | 82 | 0.00219736 | 3 | 0 | 0  | 3  | 0  | 134 | -0.5095728 | 3 | 0  | 0 | 6  | 0 |
| 45 | -1.162141  | 4 | 4 | 0 | 0  | 4  | 82 | 0.00219736 | 3 | 0 | 0  | 6  | 0  | 134 | -0.5095728 | 3 | 0  | 0 | 0  | 7 |
| 45 | -1.162141  | 4 | 0 | 0 | 0  | 0  | 82 | 0.00219736 | 3 | 0 | 0  | 7  | 0  | 134 | -0.5095728 | 3 | 1  | 0 | 0  | 9 |
| 45 | -1.162141  | 4 | 0 | 0 | 0  | 10 | 82 | 0.00219736 | 3 | 0 | 0  | 6  | 0  | 134 | -0.5095728 | 3 | 0  | 0 | 6  | 0 |
| 45 | -1.162141  | 4 | 0 | 0 | 9  | 0  | 82 | 0.00219736 | 3 | 0 | 9  | 0  | 9  | 134 | -0.5095728 | 3 | 0  | 0 | 5  | 0 |
| 45 | -1.162141  | 4 | 0 | 0 | 12 | 0  | 59 | -0.6506817 | 3 | 0 | 2  | 0  | 2  | 134 | -0.5095728 | 3 | 0  | 1 | 2  | 1 |
| 45 | -1.162141  | 4 | 0 | 0 | 5  | 0  | 59 | -0.6506817 | 2 | 6 | 0  | 0  | 0  | 134 | -0.5095728 | 3 | 4  | 2 | 1  | 0 |
| 45 | -1.162141  | 4 | 3 | 0 | 0  | 4  | 59 | -0.6506817 | 2 | 0 | 1  | 1  | 0  | 134 | -0.5095728 | 3 | 0  | 0 | 7  | 0 |
| 45 | -1.162141  | 2 | 7 | 0 | 0  | 0  | 59 | -0.6506817 | 3 | 0 | 0  | 4  | 0  | 134 | -0.5095728 | 3 | 2  | 0 | 4  | 0 |
| 45 | -1.162141  | 2 | 1 | 3 | 0  | 0  | 59 | -0.6506817 | 3 | 0 | 0  | 7  | 0  | 135 | -0.1308638 | 3 | 0  | 0 | 10 | 0 |
| 45 | -1.162141  | 2 | 0 | 3 | 4  | 0  | 59 | -0.6506817 | 3 | 0 | 0  | 0  | 0  | 135 | -0.1308638 | 3 | 0  | 0 | 2  | 0 |
| 45 | -1.162141  | 4 | 0 | 0 | 0  | 8  | 59 | -0.6506817 | 3 | 0 | 12 | 0  | 0  | 135 | -0.1308638 | 3 | 0  | 0 | 3  | 0 |
| 45 | -1.162141  | 4 | 0 | 0 | 0  | 8  | 59 | -0.6506817 | 3 | 0 | 3  | 2  | 0  | 135 | -0.1308638 | 3 | 0  | 0 | 12 | 2 |
| 45 | -1.162141  | 4 | 0 | 0 | 0  | 8  | 59 | -0.6506817 | 3 | 0 | 0  | 0  | 0  | 135 | -0.1308638 | 3 | 0  | 0 | 6  | 2 |
| 45 | -1.162141  | 4 | 0 | 0 | 0  | 10 | 59 | -0.6506817 | 3 | 0 | 12 | 0  | 0  | 135 | -0.1308638 | 3 | 0  | 0 | 0  | 0 |
| 45 | -1.162141  | 4 | 0 | 0 | 0  | 7  | 59 | -0.6506817 | 3 | 0 | 1  | 6  | 0  | 135 | -0.1308638 | 4 | 0  | 0 | 0  | 2 |
| 45 | -1.162141  | 4 | 0 | 0 | 0  | 9  | 59 | -0.6506817 | 3 | 1 | 0  | 3  | 0  | 135 | -0.1308638 | 4 | 0  | 0 | 0  | 0 |
| 45 | -1.162141  | 4 | 0 | 0 | 0  | 4  | 59 | -0.6506817 | 3 | 0 | 0  | 8  | 0  | 135 | -0.1308638 | 3 | 2  | 1 | 2  | 1 |
| 46 | -0.5263299 | 1 | 5 | 1 | 0  | 0  | 86 | -0.9389541 | 3 | 2 | 5  | 0  | 0  | 135 | -0.1308638 | 3 | 0  | 0 | 6  | 4 |
| 46 | -0.5263299 | 3 | 0 | 6 | 3  | 0  | 86 | -0.9389541 | 2 | 0 | 8  | 0  | 0  | 135 | -0.1308638 | 3 | 0  | 0 | 0  | 6 |
| 46 | -0.5263299 | 4 | 0 | 4 | 2  | 4  | 86 | -0.9389541 | 3 | 0 | 4  | 3  | 0  | 135 | -0.1308638 | 4 | 0  | 0 | 0  | 8 |
| 46 | -0.5263299 | 2 | 0 | 8 | 0  | 0  | 86 | -0.9389541 | 2 | 1 | 7  | 1  | 0  | 135 | -0.1308638 | 4 | 0  | 0 | 5  | 3 |
| 46 | -0.5263299 | 4 | 0 | 3 | 2  | 0  | 86 | -0.9389541 | 2 | 0 | 3  | 2  | 0  | 135 | -0.1308638 | 4 | 0  | 0 | 4  | 9 |
| 46 | -0.5263299 | 4 | 0 | 0 | 0  | 11 | 87 | 0.1696964  | 1 | 0 | 8  | 0  | 0  | 135 | -0.1308638 | 3 | 0  | 0 | 3  | 4 |
| 46 | -0.5263299 | 4 | 0 | 0 | 0  | 5  | 87 | 0.1696964  | 1 | 0 | 0  | 0  | 0  | 135 | -0.1308638 | 3 | 3  | 0 | 0  | 2 |
| 46 | -0.5263299 | 4 | 0 | 0 | 0  | 11 | 10 | -0.5315071 | 2 | 0 | 13 | 0  | 0  | 135 | -0.1308638 | 2 | 3  | 2 | 0  | 1 |
| 46 | -0.5263299 | 4 | 0 | 0 | 0  | 6  | 10 | -0.5315071 | 3 | 1 | 4  | 1  | 0  | 135 | -0.1308638 | 3 | 5  | 0 | 6  | 0 |
| 46 | -0.5263299 | 4 | 0 | 0 | 0  | 6  | 10 | -0.5315071 | 3 | 0 | 3  | 1  | 0  | 135 | -0.1308638 | 3 | 0  | 3 | 3  | 0 |
| 46 | -0.5263299 | 1 | 4 | 0 | 6  | 6  | 10 | -0.5315071 | 4 | 0 | 0  | 7  | 0  | 135 | -0.1308638 | 2 | 10 | 0 | 0  | 0 |
| 46 | -0.5263299 | 4 | 0 | 0 | 0  | 9  | 10 | -0.5315071 | 4 | 4 | 0  | 0  | 3  | 135 | -0.1308638 | 2 | 0  | 7 | 0  | 0 |
| 46 | -0.5263299 | 4 | 0 | 0 | 0  | 6  | 10 | -0.5315071 | 2 | 0 | 3  | 0  | 1  | 135 | -0.1308638 | 3 | 1  | 1 | 5  | 0 |
| 46 | -0.5263299 | 4 | 0 | 0 | 0  | 2  | 10 | -0.5315071 | 2 | 0 | 11 | 0  | 0  | 135 | -0.1308638 | 1 | 0  | 0 | 5  | 0 |
| 46 | -0.5263299 | 4 | 0 | 4 | 0  | 1  | 10 | -0.5315071 | 3 | 0 | 5  | 2  | 0  | 135 | -0.1308638 | 1 | 10 | 0 | 0  | 0 |
| 46 | -0.5263299 | 4 | 0 | 0 | 0  | 6  | 10 | -0.5315071 | 4 | 0 | 0  | 0  | 5  | 135 | -0.1308638 | 4 | 3  | 2 | 2  | 0 |
| 46 | -0.5263299 | 4 | 0 | 0 | 0  | 9  | 10 | -0.5315071 | 3 | 0 | 0  | 2  | 0  | 135 | -0.1308638 | 3 | 0  | 0 | 6  | 0 |
| 46 | -0.5263299 | 4 | 0 | 0 | 0  | 5  | 10 | -0.5315071 | 3 | 0 | 0  | 11 | 0  | 135 | -0.1308638 | 2 | 0  | 6 | 0  | 0 |
| 46 | -0.5263299 | 4 | 0 | 0 | 0  | 3  | 71 | -1.1600835 | 3 | 0 | 2  | 6  | 0  | 136 | -0.0402076 | 3 | 0  | 0 | 6  | 0 |
| 46 | -0.5263299 | 4 | 0 | 0 | 0  | 8  | 71 | -1.1600835 | 2 | 0 | 4  | 2  | 0  | 136 | -0.0402076 | 3 | 0  | 0 | 6  | 0 |
| 46 | -0.5263299 | 4 | 0 | 0 | 0  | 0  | 71 | -1.1600835 | 1 | 0 | 0  | 0  | 3  | 136 | -0.0402076 | 3 | 0  | 0 | 0  | 0 |
| 46 | -0.5263299 | 4 | 0 | 0 | 0  | 3  | 71 | -1.1600835 | 3 | 0 | 10 | 3  | 0  | 136 | -0.0402076 | 3 | 0  | 0 | 10 | 0 |

|    |            |   |   |   |    |    |    |            |   |   |    |    |   |     |            |   |    |    |    |     |    |
|----|------------|---|---|---|----|----|----|------------|---|---|----|----|---|-----|------------|---|----|----|----|-----|----|
| 51 | -0.9536858 | 4 | 0 | 0 | 0  | 5  | 91 | -0.9607165 | 2 | 0 | 3  | 0  | 0 | 138 | 0.00681655 | 3 | 0  | 9  | 0  | 0   | 0  |
| 51 | -0.9536858 | 4 | 0 | 0 | 0  | 6  | 91 | -0.9607165 | 2 | 0 | 3  | 0  | 0 | 139 | -0.4657482 | 2 | 0  | 0  | 4  | 0   | 0  |
| 51 | -0.9536858 | 4 | 0 | 0 | 0  | 0  | 91 | -0.9607165 | 2 | 1 | 3  | 2  | 0 | 139 | -0.4657482 | 4 | 0  | 0  | 3  | 4   | 0  |
| 51 | -0.9536858 | 4 | 0 | 0 | 3  | 3  | 91 | -0.9607165 | 2 | 1 | 2  | 0  | 0 | 139 | -0.4657482 | 4 | 0  | 0  | 0  | 0   | 0  |
| 51 | -0.9536858 | 4 | 0 | 0 | 6  | 0  | 91 | -0.9607165 | 2 | 0 | 3  | 0  | 0 | 139 | -0.4657482 | 1 | 0  | 0  | 0  | 0   | 7  |
| 51 | -0.9536858 | 4 | 0 | 0 | 0  | 0  | 91 | -0.9607165 | 2 | 0 | 4  | 2  | 0 | 139 | -0.4657482 | 1 | 2  | 0  | 0  | 0   | 4  |
| 51 | -0.9536858 | 4 | 0 | 0 | 0  | 0  | 91 | -0.9607165 | 2 | 0 | 5  | 3  | 0 | 139 | -0.4657482 | 1 | 4  | 0  | 0  | 0   | 4  |
| 51 | -0.9536858 | 4 | 0 | 0 | 0  | 0  | 91 | -0.9607165 | 2 | 0 | 4  | 3  | 0 | 139 | -0.4657482 | 1 | 0  | 0  | 0  | 0   | 6  |
| 51 | -0.9536858 | 4 | 0 | 0 | 6  | 6  | 91 | -0.9607165 | 2 | 0 | 5  | 2  | 1 | 139 | -0.4657482 | 1 | 0  | 0  | 0  | 0   | 0  |
| 51 | -0.9536858 | 4 | 0 | 0 | 11 | 11 | 91 | -0.9607165 | 2 | 0 | 3  | 1  | 1 | 139 | -0.4657482 | 1 | 0  | 0  | 7  | 0   | 0  |
| 51 | -0.9536858 | 4 | 0 | 0 | 0  | 5  | 91 | -0.9607165 | 3 | 0 | 0  | 0  | 0 | 139 | -0.4657482 | 1 | 0  | 0  | 8  | 0   | 0  |
| 51 | -0.9536858 | 4 | 0 | 0 | 2  | 0  | 92 | -0.7912643 | 2 | 2 | 3  | 2  | 0 | 139 | -0.4657482 | 1 | 0  | 0  | 2  | 4   | 0  |
| 51 | -0.9536858 | 4 | 0 | 0 | 5  | 5  | 92 | -0.7912643 | 1 | 1 | 1  | 3  | 0 | 139 | -0.4657482 | 1 | 0  | 0  | 1  | 3   | 0  |
| 51 | -0.9536858 | 4 | 0 | 0 | 9  | 2  | 92 | -0.7912643 | 1 | 2 | 0  | 1  | 3 | 139 | -0.4657482 | 1 | 0  | 0  | 0  | 0   | 0  |
| 51 | -0.9536858 | 4 | 0 | 0 | 0  | 0  | 92 | -0.7912643 | 2 | 0 | 6  | 0  | 0 | 139 | -0.4657482 | 4 | 2  | 0  | 0  | 0   | 5  |
| 51 | -0.9536858 | 4 | 0 | 0 | 0  | 0  | 93 | -1.0759657 | 3 | 3 | 0  | 5  | 0 | 139 | -0.4657482 | 1 | 6  | 0  | 0  | 0   | 0  |
| 51 | -0.9536858 | 4 | 0 | 0 | 4  | 4  | 93 | -1.0759657 | 3 | 2 | 2  | 3  | 0 | 139 | -0.4657482 | 1 | 0  | 0  | 0  | 0   | 5  |
| 51 | -0.9536858 | 4 | 0 | 0 | 0  | 14 | 93 | -1.0759657 | 3 | 0 | 6  | 2  | 0 | 139 | -0.4657482 | 1 | 3  | 0  | 0  | 3   | 4  |
| 51 | -0.9536858 | 4 | 0 | 0 | 0  | 7  | 93 | -1.0759657 | 3 | 0 | 8  | 1  | 0 | 139 | -0.4657482 | 2 | 0  | 0  | 5  | 0   | 0  |
| 51 | -0.9536858 | 4 | 0 | 0 | 0  | 4  | 93 | -1.0759657 | 4 | 0 | 8  | 0  | 0 | 139 | -0.4657482 | 1 | 5  | 0  | 0  | 0   | 0  |
| 51 | -0.9536858 | 4 | 0 | 0 | 0  | 0  | 93 | -1.0759657 | 3 | 0 | 0  | 0  | 0 | 139 | -0.4657482 | 1 | 7  | 0  | 0  | 0   | 0  |
| 51 | -0.9536858 | 4 | 0 | 0 | 0  | 0  | 93 | -1.0759657 | 3 | 0 | 3  | 3  | 0 | 139 | -0.4657482 | 1 | 4  | 0  | 3  | 0   | 0  |
| 51 | -0.9536858 | 4 | 0 | 0 | 0  | 0  | 93 | -1.0759657 | 3 | 0 | 0  | 6  | 0 | 139 | -0.4657482 | 2 | 2  | 0  | 0  | 0   | 0  |
| 51 | -0.9536858 | 4 | 0 | 0 | 5  | 5  | 93 | -1.0759657 | 3 | 0 | 0  | 0  | 0 | 139 | -0.4657482 | 1 | 3  | 0  | 0  | 3   | 0  |
| 51 | -0.9536858 | 4 | 0 | 0 | 0  | 12 | 93 | -1.0759657 | 3 | 0 | 2  | 0  | 0 | 139 | -0.4657482 | 2 | 0  | 0  | 7  | 0   | 0  |
| 51 | -0.9536858 | 4 | 0 | 0 | 0  | 7  | 93 | -1.0759657 | 4 | 0 | 0  | 0  | 0 | 139 | -0.4657482 | 1 | 3  | 0  | 3  | 0   | 0  |
| 51 | -0.9536858 | 4 | 0 | 0 | 2  | 1  | 93 | -1.0759657 | 4 | 0 | 7  | 0  | 1 | 139 | -0.4657482 | 1 | 0  | 0  | 7  | 0   | 0  |
| 51 | -0.9536858 | 4 | 0 | 0 | 0  | 9  | 93 | -1.0759657 | 3 | 1 | 0  | 5  | 0 | 139 | -0.4657482 | 2 | 7  | 0  | 0  | 0   | 0  |
| 51 | -0.9536858 | 3 | 0 | 0 | 5  | 0  | 93 | -1.0759657 | 3 | 1 | 1  | 2  | 0 | 139 | -0.4657482 | 4 | 0  | 0  | 6  | 0   | 0  |
| 51 | -0.9536858 | 4 | 0 | 0 | 0  | 0  | 93 | -1.0759657 | 3 | 1 | 5  | 1  | 0 | 139 | -0.4657482 | 2 | 0  | 0  | 4  | 0   | 0  |
| 51 | -0.9536858 | 4 | 0 | 0 | 0  | 0  | 93 | -1.0759657 | 3 | 0 | 9  | 0  | 0 | 139 | -0.4657482 | 1 | 8  | 0  | 0  | 0   | 0  |
| 51 | -0.9536858 | 4 | 0 | 0 | 0  | 0  | 93 | -1.0759657 | 3 | 0 | 8  | 1  | 1 | 139 | -0.4657482 | 1 | 2  | 0  | 0  | 0   | 0  |
| 51 | -0.9536858 | 4 | 0 | 0 | 2  | 6  | 93 | -1.0759657 | 2 | 0 | 10 | 0  | 0 | 96  | -0.8769027 | 4 | 0  | 0  | 14 | 0   | 0  |
| 51 | -0.9536858 | 4 | 0 | 0 | 0  | 10 | 93 | -1.0759657 | 3 | 0 | 6  | 1  | 0 | 96  | -0.8769027 | 4 | 0  | 0  | 3  | 2   | 0  |
| 51 | -0.9536858 | 4 | 0 | 0 | 4  | 3  | 93 | -1.0759657 | 3 | 0 | 3  | 0  | 0 | 96  | -0.8769027 | 4 | 0  | 0  | 4  | 2   | 0  |
| 51 | -0.9536858 | 4 | 0 | 0 | 3  | 3  | 93 | -1.0759657 | 2 | 0 | 2  | 2  | 0 | 96  | -0.8769027 | 4 | 0  | 0  | 0  | 0   | 8  |
| 51 | -0.9536858 | 3 | 0 | 0 | 3  | 2  | 93 | -1.0759657 | 2 | 0 | 2  | 0  | 0 | 96  | -0.8769027 | 4 | 0  | 0  | 0  | 0   | 8  |
| 51 | -0.9536858 | 3 | 0 | 0 | 0  | 0  | 93 | -1.0759657 | 3 | 0 | 8  | 0  | 0 | 96  | -0.8769027 | 4 | 0  | 0  | 0  | 0   | 6  |
| 51 | -0.9536858 | 3 | 0 | 0 | 6  | 0  | 93 | -1.0759657 | 4 | 0 | 0  | 5  | 0 | 96  | -0.8769027 | 4 | 2  | 0  | 0  | 0   | 0  |
| 51 | -0.9536858 | 3 | 0 | 0 | 3  | 0  | 93 | -1.0759657 | 3 | 0 | 6  | 1  | 0 | 96  | -0.8769027 | 4 | 0  | 0  | 0  | 0   | 0  |
| 51 | -0.9536858 | 3 | 0 | 0 | 6  | 0  | 93 | -1.0759657 | 3 | 0 | 2  | 1  | 0 | 96  | -0.8769027 | 4 | 0  | 0  | 3  | 3   | 0  |
| 51 | -0.9536858 | 3 | 0 | 0 | 8  | 0  | 93 | -1.0759657 | 3 | 0 | 0  | 0  | 0 | 96  | -0.8769027 | 4 | 0  | 0  | 0  | 0   | 8  |
| 51 | -0.9536858 | 3 | 0 | 0 | 0  | 0  | 93 | -1.0759657 | 3 | 0 | 8  | 0  | 0 | 96  | -0.8769027 | 4 | 0  | 0  | 0  | 0   | 8  |
| 52 | -0.9820581 | 3 | 0 | 0 | 0  | 0  | 93 | -1.0759657 | 3 | 0 | 1  | 9  | 0 | 96  | -0.8769027 | 3 | 3  | 0  | 2  | 0   | 0  |
| 52 | -0.9820581 | 3 | 0 | 0 | 5  | 0  | 93 | -1.0759657 | 3 | 0 | 6  | 2  | 0 | 96  | -0.8769027 | 3 | 6  | 0  | 1  | 0   | 0  |
| 53 | -1.890367  | 4 | 0 | 0 | 0  | 5  | 93 | -1.0759657 | 4 | 0 | 3  | 0  | 0 | 96  | -0.8769027 | 3 | 0  | 2  | 2  | 1   | 0  |
| 53 | -1.890367  | 3 | 0 | 0 | 8  | 0  | 93 | -1.0759657 | 3 | 0 | 5  | 3  | 0 | 96  | -0.8769027 | 3 | 0  | 2  | 5  | 0   | 0  |
| 53 | -1.890367  | 3 | 0 | 0 | 0  | 7  | 93 | -1.0759657 | 3 | 0 | 2  | 0  | 0 | 96  | -0.8769027 | 3 | 0  | 1  | 8  | 0   | 0  |
| 53 | -1.890367  | 3 | 0 | 0 | 7  | 7  | 93 | -1.0759657 | 3 | 0 | 8  | 0  | 0 | 96  | -0.8769027 | 3 | 0  | 0  | 10 | 0   | 0  |
| 53 | -1.890367  | 3 | 0 | 0 | 0  | 0  | 93 | -1.0759657 | 3 | 0 | 1  | 4  | 1 | 96  | -0.8769027 | 4 | 0  | 0  | 9  | 0   | 0  |
| 53 | -1.890367  | 3 | 0 | 0 | 4  | 1  | 93 | -1.0759657 | 3 | 0 | 3  | 6  | 0 | 96  | -0.8769027 | 2 | 11 | 0  | 0  | 0   | 0  |
| 53 | -1.890367  | 4 | 0 | 0 | 6  | 4  | 93 | -1.0759657 | 2 | 0 | 10 | 0  | 0 | 44  | -0.8338155 | 1 | 2  | 0  | 4  | 0   | 0  |
| 53 | -1.890367  | 3 | 0 | 0 | 0  | 0  | 93 | -1.0759657 | 4 | 0 | 0  | 0  | 7 | 44  | -0.8338155 | 4 | 0  | 13 | 0  | 0   | 0  |
| 53 | -1.890367  | 3 | 0 | 0 | 6  | 0  | 93 | -1.0759657 | 4 | 0 | 0  | 0  | 0 | 44  | -0.8338155 | 4 | 0  | 0  | 0  | 0   | 11 |
| 53 | -1.890367  | 3 | 0 | 0 | 0  | 0  | 93 | -1.0759657 | 4 | 0 | 0  | 10 | 0 | 44  | -0.8338155 | 4 | 0  | 0  | 0  | 0   | 0  |
| 53 | -1.890367  | 3 | 0 | 0 | 6  | 0  | 93 | -1.0759657 | 4 | 0 | 1  | 0  | 6 | 44  | -0.8338155 | 1 | 3  | 0  | 0  | 0   | 0  |
| 53 | -1.890367  | 3 | 0 | 0 | 0  | 0  | 94 | 0.40549992 | 4 | 0 | 0  | 0  | 7 | 44  | -0.8338155 | 1 | 8  | 0  | 0  | 0   | 0  |
| 54 | -0.7758386 | 4 | 0 | 0 | 7  | 3  | 94 | 0.40549992 | 1 | 3 | 0  | 4  | 0 | 44  | -0.8338155 | 1 | 1  | 0  | 4  | 0   | 0  |
| 54 | -0.7758386 | 4 | 0 | 0 | 0  | 2  | 94 | 0.40549992 | 1 | 4 | 0  | 0  | 0 | 44  | -0.8338155 | 2 | 4  | 0  | 0  | 0   | 0  |
| 54 | -0.7758386 | 4 | 0 | 0 | 0  | 0  | 94 | 0.40549992 | 2 | 0 | 3  | 2  | 0 | 44  | -0.8338155 | 1 | 4  | 0  | 7  | 0   | 0  |
| 54 | -0.7758386 | 4 | 0 | 0 | 8  | 8  | 94 | 0.40549992 | 2 | 0 | 4  | 2  | 0 | 44  | -0.8338155 | 3 | 0  | 2  | 3  | 0   | 0  |
| 54 | -0.7758386 | 4 | 0 | 0 | 0  | 4  | 94 | 0.40549992 | 2 | 0 | 4  | 2  | 0 | 44  | -0.8338155 | 3 | 0  | 1  | 5  | 0   | 0  |
| 54 | -0.7758386 | 4 | 0 | 0 | 2  | 5  | 94 | 0.40549992 | 2 | 0 | 2  | 3  | 0 | 44  | -0.8338155 | 3 | 5  | 2  | 0  | 0   | 0  |
| 54 | -0.7758386 | 4 | 0 | 0 | 0  | 3  | 94 | 0.40549992 | 2 | 5 | 1  | 0  | 0 | 44  | -0.8338155 | 3 | 4  | 0  | 4  | 0   | 0  |
| 54 | -0.7758386 | 4 | 0 | 0 | 0  | 4  | 94 | 0.40549992 | 2 | 1 | 2  | 4  | 0 | 44  | -0.8338155 | 2 | 0  | 7  | 0  | 0   | 0  |
| 54 | -0.7758386 | 4 | 0 | 0 | 0  | 0  | 94 | 0.40549992 | 2 | 1 | 2  | 2  | 0 | 44  | -0.8338155 | 4 | 7  | 0  | 0  | 0   | 0  |
| 54 | -0.7758386 | 4 | 0 | 0 | 0  | 0  | 94 | 0.40549992 | 2 | 0 | 4  | 0  | 0 | 44  | -0.8338155 | 1 | 6  | 0  | 4  | 0   | 0  |
| 54 | -0.7758386 | 4 | 0 | 0 | 0  | 4  | 94 | 0.40549992 | 2 | 0 | 3  | 2  | 0 | 44  | -0.8338155 | 1 | 3  | 0  | 0  | 0   | 0  |
| 54 | -0.7758386 | 4 | 0 | 0 | 0  | 3  | 94 | 0.40549992 | 2 | 0 | 6  | 2  | 0 | 46  | -0.5263299 | 4 | 4  | 2  | 0  | 0   | 0  |
| 54 | -0.7758386 | 4 | 0 | 0 | 0  | 6  | 94 | 0.40549992 | 2 | 0 | 8  | 1  | 0 | 46  | -0.5263299 | 4 | 0  | 0  | 4  | 6   | 0  |
| 54 | -0.7758386 | 4 | 0 | 0 | 0  | 2  | 94 | 0.40549992 | 2 | 0 | 6  | 0  | 0 | 46  | -0.5263299 | 4 | 1  | 0  | 4  | 2   | 0  |
| 54 | -0.7758386 | 3 | 0 | 0 | 12 | 3  | 94 | 0.40549992 | 2 | 0 | 9  | 9  | 0 | 46  | -0.5263299 | 4 | 0  | 0  | 0  | 0   | 8  |
| 54 | -0.7758386 | 4 | 0 | 0 | 4  | 0  | 94 | 0.40549992 | 2 | 0 | 2  | 8  | 0 | 46  | -0.5263299 | 4 | 0  | 0  | 0  | 0   | 2  |
| 54 | -0.7758386 | 4 | 0 | 0 | 0  | 10 | 94 | 0.40549992 | 2 | 0 | 7  | 2  | 0 | 46  | -0.5263299 | 4 | 0  | 0  | 0  | 0   | 7  |
| 54 | -0.7758386 | 4 | 0 | 0 | 1  | 3  | 94 | 0.40549992 | 2 | 0 | 8  | 0  | 0 | 46  | -0.5263299 | 4 | 0  | 0  | 11 | 0</ |    |

|               |   |    |   |   |    |               |   |   |    |   |   |                |   |   |   |    |    |
|---------------|---|----|---|---|----|---------------|---|---|----|---|---|----------------|---|---|---|----|----|
| 12 0.03251334 | 1 | 0  | 0 | 0 | 0  | 97 0.10978981 | 3 | 0 | 2  | 7 | 0 | 141 0.0553104  | 2 | 2 | 7 | 0  | 0  |
| 12 0.03251334 | 1 | 0  | 0 | 0 | 0  | 97 0.10978981 | 3 | 0 | 3  | 2 | 0 | 142 -0.4354791 | 4 | 0 | 0 | 0  | 10 |
| 12 0.03251334 | 1 | 6  | 0 | 0 | 0  | 97 0.10978981 | 3 | 0 | 1  | 3 | 0 | 142 -0.4354791 | 4 | 0 | 0 | 0  | 7  |
| 12 0.03251334 | 1 | 7  | 0 | 0 | 0  | 97 0.10978981 | 3 | 0 | 7  | 2 | 0 | 142 -0.4354791 | 4 | 0 | 0 | 4  | 1  |
| 12 0.03251334 | 1 | 10 | 0 | 0 | 0  | 97 0.10978981 | 4 | 0 | 7  | 0 | 0 | 142 -0.4354791 | 3 | 2 | 0 | 3  | 0  |
| 12 0.03251334 | 1 | 0  | 0 | 0 | 0  | 97 0.10978981 | 2 | 0 | 5  | 2 | 0 | 142 -0.4354791 | 1 | 5 | 0 | 2  | 0  |
| 57 0.46721311 | 1 | 8  | 0 | 0 | 0  | 97 0.10978981 | 2 | 0 | 4  | 3 | 0 | 142 -0.4354791 | 3 | 0 | 1 | 5  | 0  |
| 57 0.46721311 | 1 | 6  | 0 | 0 | 0  | 97 0.10978981 | 3 | 0 | 2  | 5 | 0 | 142 -0.4354791 | 3 | 2 | 1 | 2  | 0  |
| 57 0.46721311 | 1 | 4  | 0 | 0 | 0  | 97 0.10978981 | 3 | 0 | 7  | 0 | 0 | 142 -0.4354791 | 3 | 4 | 0 | 4  | 0  |
| 57 0.46721311 | 1 | 13 | 0 | 0 | 0  | 97 0.10978981 | 3 | 0 | 0  | 6 | 0 | 142 -0.4354791 | 3 | 0 | 0 | 6  | 0  |
| 57 0.46721311 | 1 | 0  | 0 | 0 | 0  | 97 0.10978981 | 4 | 0 | 0  | 0 | 5 | 38 -0.6944448  | 4 | 0 | 0 | 3  | 4  |
| 57 0.46721311 | 1 | 8  | 0 | 0 | 0  | 98 0.41604249 | 2 | 0 | 6  | 0 | 0 | 38 -0.6944448  | 4 | 0 | 0 | 1  | 5  |
| 57 0.46721311 | 1 | 0  | 0 | 0 | 5  | 98 0.41604249 | 2 | 0 | 9  | 0 | 0 | 38 -0.6944448  | 4 | 0 | 0 | 0  | 8  |
| 57 0.46721311 | 1 | 0  | 0 | 0 | 6  | 98 0.41604249 | 3 | 0 | 9  | 0 | 0 | 38 -0.6944448  | 4 | 0 | 0 | 7  | 0  |
| 57 0.46721311 | 1 | 11 | 0 | 0 | 0  | 98 0.41604249 | 2 | 0 | 10 | 0 | 0 | 38 -0.6944448  | 3 | 5 | 0 | 4  | 0  |
| 57 0.46721311 | 1 | 6  | 0 | 0 | 1  | 98 0.41604249 | 2 | 0 | 5  | 1 | 0 | 38 -0.6944448  | 2 | 0 | 0 | 10 | 0  |
| 57 0.46721311 | 1 | 4  | 0 | 0 | 4  | 98 0.41604249 | 3 | 0 | 7  | 1 | 0 | 38 -0.6944448  | 2 | 3 | 1 | 4  | 0  |
| 57 0.46721311 | 4 | 0  | 0 | 0 | 12 | 98 0.41604249 | 2 | 0 | 0  | 0 | 0 | 38 -0.6944448  | 3 | 1 | 0 | 7  | 0  |
| 57 0.46721311 | 1 | 4  | 0 | 0 | 1  | 98 0.41604249 | 2 | 0 | 1  | 6 | 0 | 143 0.31324494 | 1 | 8 | 0 | 0  | 0  |
| 57 0.46721311 | 1 | 6  | 0 | 0 | 0  | 98 0.41604249 | 3 | 0 | 3  | 3 | 0 | 143 0.31324494 | 1 | 0 | 0 | 8  | 0  |
|               |   |    |   |   |    |               |   |   |    |   |   | 143 0.31324494 | 1 | 0 | 3 | 5  | 0  |
|               |   |    |   |   |    |               |   |   |    |   |   | 143 0.31324494 | 1 | 3 | 3 | 0  | 0  |
|               |   |    |   |   |    |               |   |   |    |   |   | 143 0.31324494 | 1 | 0 | 0 | 0  | 0  |
|               |   |    |   |   |    |               |   |   |    |   |   | 143 0.31324494 | 1 | 8 | 0 | 0  | 0  |
|               |   |    |   |   |    |               |   |   |    |   |   | 143 0.31324494 | 1 | 4 | 2 | 1  | 0  |
|               |   |    |   |   |    |               |   |   |    |   |   | 143 0.31324494 | 2 | 5 | 2 | 0  | 0  |
